# Supplementary material
Source: MDPI journal article supplement (https://www.mdpi.com/2075-163X/12/2/194)
Supplement: s1 [file s1]

# **Integrative Study Assessing Space And Time Variations With Emphasis On Rare Earth Elements (REE) Distribution And Their Potential On Ashes Of A Commercial (Colombian) Coal**

**Ana Cláudia Santos<sup>1\*</sup>, Alexandra Guedes<sup>1</sup>, David French<sup>2</sup>, Aurora Futuro<sup>3</sup>, Bruno Valentim<sup>1</sup>**

<sup>1</sup> Earth Science Institute—Porto Pole, Department of Geosciences, Environment and Spatial Plannings, Faculty of Sciences, University of Porto, Rua do Campo Alegre s/n, 4169-007 Porto, Portugal; aguedes@fc.up.pt (A.G.); bvvalent@fc.up.pt (B.V.)

<sup>2</sup> School of Biological, Earth and Environmental Sciences, University of New South Wales, Sydney, NSW 2052, Australia; davidfrench474@gmail.com

<sup>3</sup> Centro de Recursos Naturais e Ambiente (CERENA), Faculty of Engineering, University of Porto, , Rua Dr. Roberto Frias s/n, 4200-465 Porto, Portugal; afuturo@fe.up.pt

\* Correspondence: [anasantos@fc.up.pt](mailto:anasantos@fc.up.pt)

Table S1 - Trace elements (ppm), enrichment patterns and anomalies for individual REE for feed coals.

|                                  | S1    | S2    |       | S3    |       | S4    |       | Minimum | Average | Maximum | CV (%) |
|----------------------------------|-------|-------|-------|-------|-------|-------|-------|---------|---------|---------|--------|
|                                  | C     | C1    | C2    | C1    | C2    | C1    | C2    |         |         |         |        |
| Ba                               | 46    | 129   | 185   | 100   | 154   | 158   | 86    | 46      | 123     | 185     | 36.3   |
| Be                               | <1    | <1    | <1    | <1    | <1    | <1    | <1    | <1      | n.a.    | <1      | n.a.   |
| Co                               | 1.3   | 2.3   | 2.3   | 2.7   | 2.8   | 3.3   | 1.9   | 1.30    | 2.37    | 3.30    | 25.4   |
| Cs                               | <0.1  | 0.6   | 0.5   | 0.7   | 0.4   | 0.8   | 0.5   | 0.4     | 0.6     | 0.8     | 23.0   |
| Ga                               | <0.5  | 1.3   | 0.6   | 1.3   | 1.2   | 1.3   | <0.5  | <0.5    | 0.9     | 1.3     | 52.3   |
| Hf                               | 0.2   | 0.6   | 0.4   | 0.5   | 0.3   | 0.6   | 0.5   | 0.2     | 0.4     | 0.6     | 31.6   |
| Nb                               | <0.1  | 0.9   | 1.1   | 1.4   | 1.1   | 1.3   | 0.8   | <0.1    | 1.0     | 1.4     | 43.7   |
| Rb                               | 1.5   | 7.3   | 7.4   | 10    | 6.4   | 9.1   | 8.4   | 1.5     | 7.2     | 10.0    | 35.8   |
| Sn                               | <1    | <1    | <1    | <1    | <1    | <1    | <1    | <1      | n.a.    | <1      | n.a.   |
| Sr                               | 31.4  | 44.5  | 58.8  | 33    | 45.8  | 45.3  | 26.6  | 26.6    | 40.8    | 58.8    | 25.1   |
| Ta                               | <0.1  | <0.1  | <0.1  | <0.1  | <0.1  | <0.1  | <0.1  | <0.1    | n.a.    | <0.1    | n.a.   |
| Th                               | 0.3   | 1.1   | 0.9   | 1     | 0.8   | 1.1   | 0.8   | 0.3     | 0.9     | 1.1     | 29.8   |
| U                                | 0.3   | 0.6   | 0.6   | 0.6   | 0.5   | 0.6   | 0.5   | 0.3     | 0.5     | 0.6     | 19.5   |
| V                                | <8    | 30    | <8    | 29    | 25    | 32    | <8    | <8      | 18      | 32      | 65.4   |
| W                                | <0.5  | <0.5  | 0.5   | <0.5  | <0.5  | <0.5  | <0.5  | <0.5    | n.a.    | 0.50    | n.a.   |
| Zr                               | 6.7   | 20.9  | 16.7  | 18.1  | 17.7  | 21.3  | 15.5  | 6.7     | 16.7    | 21.3    | 27.1   |
| La                               | 1.5   | 4.4   | 3.4   | 4.2   | 3.5   | 4     | 3.4   | 1.5     | 3.5     | 4.4     | 25.6   |
| Ce                               | 2.3   | 6.5   | 5.9   | 7.3   | 6.1   | 7.2   | 6.5   | 2.3     | 6.0     | 7.3     | 26.4   |
| Pr                               | 0.25  | 0.75  | 0.69  | 0.83  | 0.65  | 0.83  | 0.7   | 0.25    | 0.67    | 0.83    | 27.3   |
| Nd                               | 1     | 2.9   | 2.9   | 3.1   | 2.6   | 3.3   | 2.4   | 1.0     | 2.6     | 3.3     | 27.3   |
| Sm                               | 0.21  | 0.53  | 0.64  | 0.67  | 0.53  | 0.63  | 0.57  | 0.21    | 0.54    | 0.67    | 26.7   |
| Eu                               | 0.05  | 0.13  | 0.11  | 0.16  | 0.15  | 0.16  | 0.13  | 0.05    | 0.13    | 0.16    | 28.1   |
| Gd                               | 0.19  | 0.62  | 0.61  | 0.58  | 0.58  | 0.73  | 0.49  | 0.19    | 0.54    | 0.73    | 29.2   |
| Tb                               | 0.03  | 0.09  | 0.1   | 0.1   | 0.09  | 0.12  | 0.08  | 0.03    | 0.09    | 0.12    | 29.9   |
| Dy                               | 0.22  | 0.65  | 0.58  | 0.61  | 0.58  | 0.71  | 0.44  | 0.22    | 0.54    | 0.71    | 28.1   |
| Y                                | 0.9   | 4     | 3.7   | 3.4   | 3.9   | 4.3   | 2.9   | 0.90    | 3.30    | 4.30    | 32.3   |
| Ho                               | 0.04  | 0.13  | 0.12  | 0.1   | 0.12  | 0.14  | 0.11  | 0.04    | 0.11    | 0.14    | 28.0   |
| Er                               | 0.14  | 0.38  | 0.39  | 0.35  | 0.35  | 0.49  | 0.3   | 0.14    | 0.34    | 0.49    | 28.8   |
| Tm                               | 0.01  | 0.06  | 0.05  | 0.05  | 0.05  | 0.06  | 0.04  | 0.01    | 0.05    | 0.06    | 34.8   |
| Yb                               | 0.12  | 0.35  | 0.3   | 0.29  | 0.3   | 0.42  | 0.25  | 0.12    | 0.29    | 0.42    | 29.5   |
| Lu                               | 0.01  | 0.05  | 0.05  | 0.04  | 0.04  | 0.06  | 0.04  | 0.01    | 0.04    | 0.06    | 35.2   |
| ΣREE                             | 6.97  | 21.54 | 19.54 | 21.78 | 19.54 | 23.15 | 18.35 | 6.97    | 18.70   | 23.15   | 26.9   |
| REO                              | 8.36  | 25.92 | 23.52 | 26.19 | 23.55 | 27.86 | 22.09 | 8.36    | 22.50   | 27.86   | 26.9   |
| L/H                              | 6.99  | 6.53  | 6.20  | 7.67  | 6.41  | 5.90  | 7.83  | 5.90    | 6.79    | 7.83    | 10.0   |
| Critical                         | 2.34  | 8.15  | 7.78  | 7.72  | 7.67  | 9.08  | 6.25  | 2.34    | 7.00    | 9.08    | 29.3   |
| Uncritical                       | 2.15  | 6.3   | 5.34  | 6.28  | 5.26  | 6.19  | 5.16  | 2.15    | 5.24    | 6.30    | 25.7   |
| Excessive                        | 2.48  | 7.09  | 6.42  | 7.78  | 6.61  | 7.88  | 6.94  | 2.48    | 6.46    | 7.88    | 26.3   |
| La <sub>N</sub> /Lu <sub>N</sub> | 1.50  | 0.88  | 0.68  | 1.05  | 0.88  | 0.67  | 0.85  | 0.67    | 0.93    | 1.50    | 28.3   |
| La <sub>N</sub> /Sm <sub>N</sub> | 1.08  | 1.26  | 0.81  | 0.95  | 1.00  | 0.96  | 0.90  | 0.81    | 1.00    | 1.26    | 13.4   |
| Gd <sub>N</sub> /Lu <sub>N</sub> | 1.47  | 0.96  | 0.95  | 1.12  | 1.12  | 0.94  | 0.95  | 0.94    | 1.07    | 1.47    | 16.7   |
| Y <sub>N</sub> /Ho <sub>N</sub>  | 0.89  | 1.22  | 1.22  | 1.34  | 1.28  | 1.21  | 1.04  | 0.89    | 1.17    | 1.34    | 12.3   |
| Eu <sub>N</sub> /Eu*             | 1.13  | 1.10  | 0.79  | 1.12  | 1.27  | 1.09  | 1.09  | 0.79    | 1.09    | 1.27    | 12.2   |
| Ce <sub>N</sub> /Ce*             | 0.87  | 0.83  | 0.91  | 0.92  | 0.95  | 0.93  | 0.99  | 0.83    | 0.91    | 0.99    | 5.1    |
| Gd <sub>N</sub> /Gd*             | 1.09  | 1.26  | 1.08  | 1.02  | 1.18  | 1.15  | 1.05  | 1.02    | 1.12    | 1.26    | 6.8    |
| REYdef, rel%                     | 33.57 | 37.84 | 39.82 | 35.45 | 39.25 | 39.22 | 34.06 | 33.57   | 37.03   | 39.82   | 6.6    |
| C <sub>outl</sub>                | 0.94  | 1.15  | 1.21  | 0.99  | 1.16  | 1.15  | 0.90  | 0.90    | 1.07    | 1.21    | 10.7   |

CV, coefficient of variation; REO, REE as oxides, L/H, ratio between light REE and heavy REE; REYdef, rel%,  
 $(Y+Nd+Eu+Tb+Dy+Er)/\Sigma REE$ ; C<sub>outl</sub>,  $((Nd+Eu+Tb+Dy+Er+Y)/\Sigma REE)/((Ce+Ho+Tm+Yb+Lu)/\Sigma REE)$

Table S2 - Trace elements (ppm), enrichment patterns, anomalies for individual REE for bulk coal combustion ashes.

| Campaign | Sample   | Ba   | Be   | Co   | Cs   | Ga   | Hf   | Nb   | Rb   | Sn   | Sr   | Ta   | Th   | U    | V    | W    | Zr   | La   | Ce   | Pr   | Nd   | Sm   | Eu   | Gd   | Tb   | Dy   | Y    | Ho   | Er   |
|----------|----------|------|------|------|------|------|------|------|------|------|------|------|------|------|------|------|------|------|------|------|------|------|------|------|------|------|------|------|------|
| S1       | BA       | 794  | 3    | 16.6 | 6.6  | 13.9 | 5.5  | 11.8 | 92.5 | 1    | 234  | 0.9  | 11.1 | 4.2  | 207  | 1.3  | 211  | 33   | 64.3 | 7.71 | 30.5 | 5.34 | 1.24 | 5.22 | 0.86 | 4.74 | 28.8 | 0.99 | 3.11 |
|          | ECO      | 699  | 2    | 14.2 | 5.1  | 11.9 | 4.9  | 9.1  | 72.7 | 1    | 206  | 0.7  | 9    | 3.6  | 172  | 1    | 197  | 28.8 | 53.4 | 6.41 | 24.8 | 4.76 | 1.04 | 4.34 | 0.72 | 4.24 | 24.8 | 0.87 | 2.63 |
|          | ESP12    | 861  | 3    | 18.6 | 7.2  | 21.7 | 4.7  | 12   | 103  | 6    | 255  | 1    | 10.4 | 5.1  | 235  | 4.6  | 182  | 34.4 | 66   | 7.8  | 30.1 | 5.62 | 1.2  | 5.13 | 0.83 | 5.19 | 29.1 | 1.02 | 3.15 |
|          | ESP15    | 728  | 4    | 17.9 | 6.3  | 18.4 | 4.7  | 10.8 | 87.2 | 3    | 247  | 0.8  | 9.9  | 4.4  | 211  | 1.8  | 173  | 32.3 | 61.5 | 7.25 | 27.2 | 5.21 | 1.23 | 4.67 | 0.78 | 4.68 | 25.9 | 0.95 | 2.92 |
|          | ESP22    | 894  | 4    | 18.3 | 7.8  | 24.4 | 4.7  | 12.1 | 104  | 3    | 250  | 0.7  | 10.8 | 5.2  | 252  | 2.6  | 173  | 34.4 | 66.2 | 7.94 | 30.7 | 6    | 1.25 | 5.14 | 0.83 | 4.98 | 29.1 | 1.02 | 3.02 |
|          | ESP25    | 879  | 4    | 19.1 | 7.3  | 25.1 | 5.1  | 13.1 | 96   | 3    | 275  | 0.8  | 12.1 | 5.3  | 266  | 2.2  | 190  | 36.1 | 70.1 | 8.41 | 31.9 | 6.4  | 1.42 | 5.75 | 0.9  | 5.25 | 32.2 | 1.1  | 3.22 |
|          | ESP32/42 | 853  | 3    | 17   | 7.2  | 20.4 | 5.1  | 11.6 | 98.7 | 2    | 246  | 0.9  | 10.4 | 4.8  | 224  | 1.8  | 182  | 34.3 | 63.9 | 7.64 | 30   | 5.72 | 1.22 | 5.21 | 0.83 | 4.72 | 29.7 | 0.98 | 3.03 |
|          | ESP35/45 | 866  | 3    | 18.9 | 7.3  | 22.9 | 4.6  | 12   | 96.1 | 3    | 272  | 0.9  | 11   | 5.6  | 247  | 2.3  | 177  | 34.3 | 66.1 | 8.01 | 30.6 | 5.95 | 1.3  | 5.16 | 0.84 | 4.89 | 29.3 | 1.04 | 3.03 |
|          | Silo     | 946  | 3    | 19.9 | 8.3  | 24.5 | 4.9  | 12.6 | 108  | 3    | 264  | 0.9  | 11.9 | 6    | 270  | 2.2  | 185  | 36.8 | 71.6 | 8.54 | 32.2 | 6.05 | 1.4  | 5.5  | 0.89 | 5.26 | 31   | 1.11 | 3.35 |
| S2       | ECO      | 1053 | 4    | 20.5 | 4.9  | 11.2 | 5    | 9.4  | 59.5 | 1    | 387  | 0.7  | 9    | 3.8  | 173  | 1.1  | 206  | 28.2 | 54.8 | 6.48 | 25.2 | 5.11 | 1.14 | 4.93 | 0.81 | 4.92 | 30.4 | 0.97 | 3.04 |
|          | ESP12    | 1806 | 4    | 26.3 | 6.7  | 26.7 | 5.6  | 12.2 | 84   | 3    | 603  | 0.9  | 12   | 6.1  | 282  | 2.8  | 206  | 36.3 | 68   | 8.19 | 32.3 | 6.6  | 1.53 | 6.62 | 1.08 | 6.71 | 42.2 | 1.48 | 4.29 |
|          | ESP22    | 2336 | 10   | 34.1 | 7.4  | 47.1 | 5.3  | 14.1 | 98.2 | 5    | 775  | 0.9  | 12.9 | 8    | 368  | 4.2  | 206  | 42.7 | 80.5 | 9.86 | 38.7 | 7.54 | 1.87 | 7.93 | 1.24 | 7.73 | 48.2 | 1.67 | 4.87 |
|          | ESP32/42 | 1712 | 7    | 29   | 8.4  | 46.7 | 5.1  | 14.5 | 111  | 6    | 530  | 1    | 13.9 | 8.5  | 398  | 4.6  | 189  | 45   | 82.9 | 10.2 | 39.9 | 7.7  | 1.77 | 7.33 | 1.15 | 6.95 | 42   | 1.42 | 4.35 |
|          | Silo     | 1770 | 7    | 25.3 | 6.7  | 27.3 | 5.2  | 12.6 | 86.1 | 3    | 600  | 0.8  | 12.7 | 6    | 269  | 3.2  | 210  | 37.1 | 68.6 | 8.32 | 32.4 | 6.84 | 1.53 | 6.86 | 1.08 | 6.86 | 41.3 | 1.41 | 4.35 |
| S3       | BA       | 907  | 4    | 18.5 | 6.1  | 13.2 | 5.2  | 11.5 | 84.8 | 1    | 295  | 0.8  | 10.5 | 4.6  | 202  | 1    | 202  | 34   | 65.1 | 7.8  | 29.8 | 5.87 | 1.32 | 5.72 | 0.9  | 5.49 | 32.6 | 1.16 | 3.45 |
|          | ESP12    | 1182 | 4    | 22.7 | 7.6  | 24.4 | 5.2  | 13.2 | 99.5 | 3    | 377  | 0.8  | 12.4 | 5.9  | 269  | 2    | 200  | 37.7 | 71.8 | 8.49 | 32.3 | 6.58 | 1.48 | 6.18 | 0.99 | 6.34 | 37.7 | 1.25 | 3.84 |
|          | ESP22    | 1378 | 3    | 27.6 | 8    | 35.4 | 5    | 14.3 | 105  | 4    | 426  | 1    | 13.3 | 7.6  | 327  | 3.1  | 187  | 40.7 | 77.1 | 9.41 | 36.4 | 7.27 | 1.63 | 6.81 | 1.07 | 6.71 | 40.1 | 1.38 | 4.09 |
|          | ESP32    | 1614 | 7    | 32.1 | 8.7  | 51.4 | 5    | 16   | 114  | 7    | 470  | 1.1  | 14.7 | 10.2 | 424  | 5    | 188  | 48.2 | 87.8 | 10.7 | 40.6 | 8.04 | 1.9  | 7.5  | 1.16 | 6.93 | 42.2 | 1.45 | 4.38 |
|          | Silo     | 1152 | 4    | 22.8 | 7.2  | 26.8 | 5.1  | 12.5 | 94.5 | 3    | 365  | 0.9  | 11.6 | 6.5  | 276  | 2.6  | 186  | 37.4 | 71.3 | 8.38 | 32.4 | 6.35 | 1.41 | 6    | 0.94 | 5.85 | 34.4 | 1.2  | 3.74 |
| S4       | BA       | 905  | 3    | 20   | 6.3  | 12.9 | 5.6  | 12.1 | 86   | <1   | 286  | 0.9  | 11.2 | 4.3  | 200  | 1.3  | 204  | 33.9 | 66.6 | 7.94 | 30.7 | 6.03 | 1.35 | 5.77 | 0.89 | 5.41 | 31.8 | 1.14 | 3.37 |
|          | ECO      | 804  | 5    | 18.2 | 5.6  | 11.1 | 5    | 10.8 | 76.8 | <1   | 271  | 0.6  | 10   | 3.9  | 185  | 1.2  | 189  | 31.6 | 61   | 7.18 | 27.9 | 5.43 | 1.18 | 5.06 | 0.8  | 4.89 | 29.5 | 0.99 | 3.13 |
|          | ESP12    | 1053 | 4    | 21.8 | 7    | 23.3 | 4.7  | 11.9 | 94.3 | 2    | 326  | 0.9  | 11.2 | 5.5  | 246  | 1.9  | 181  | 35.4 | 68.1 | 8.03 | 31.3 | 6.27 | 1.36 | 5.66 | 0.91 | 5.26 | 33.8 | 1.18 | 3.63 |
|          | ESP22    | 1291 | 8    | 26.6 | 7.5  | 36   | 4.6  | 13.8 | 106  | 4    | 391  | 1    | 12.6 | 7.3  | 322  | 4    | 176  | 40.4 | 74.9 | 9.15 | 35.6 | 6.64 | 1.54 | 6.27 | 0.99 | 6.23 | 36.7 | 1.32 | 3.71 |
|          | ESP32    | 1582 | 9    | 32.6 | 8.2  | 48.7 | 4.7  | 14.4 | 113  | 6    | 449  | 1    | 14.6 | 9.2  | 392  | 6    | 184  | 44.9 | 84.8 | 10.2 | 39.9 | 7.89 | 1.81 | 7.34 | 1.12 | 7.14 | 41.1 | 1.43 | 4.35 |
|          | Silo     | 1095 | 2    | 23.9 | 7.4  | 25   | 4.8  | 12.8 | 99.6 | 3    | 346  | 1    | 12.1 | 5.8  | 265  | 4.6  | 187  | 37.4 | 72.5 | 8.59 | 33.2 | 6.52 | 1.42 | 6.18 | 0.96 | 5.69 | 35.5 | 1.18 | 3.64 |
| Minimum  |          | 699  | 2    | 14.2 | 4.9  | 11.1 | 4.6  | 9.1  | 59.5 | <1   | 206  | 0.6  | 9    | 3.6  | 172  | 1    | 173  | 28.2 | 53.4 | 6.41 | 24.8 | 4.76 | 1.04 | 4.34 | 0.72 | 4.24 | 24.8 | 0.87 | 2.63 |
| Average  |          | 1166 | 4.56 | 22.5 | 7.07 | 26   | 5.01 | 12.4 | 94.8 | 3.08 | 366  | 0.88 | 11.7 | 5.9  | 267  | 2.74 | 191  | 36.6 | 69.6 | 8.34 | 32.3 | 6.31 | 1.42 | 5.93 | 0.94 | 5.72 | 34.4 | 1.19 | 3.59 |
| Maximum  |          | 2336 | 10   | 34.1 | 8.7  | 51.4 | 5.6  | 16   | 114  | 7    | 775  | 1.1  | 14.7 | 10.2 | 424  | 6    | 211  | 48.2 | 87.8 | 10.7 | 40.6 | 8.04 | 1.9  | 7.93 | 1.24 | 7.73 | 48.2 | 1.67 | 4.87 |
| CV (%)   |          | 35.2 | 46.4 | 23.6 | 13.5 | 45.4 | 5.71 | 12.3 | 13.5 | 57.8 | 37.7 | 13.4 | 12.9 | 28.8 | 25.8 | 51.3 | 6.02 | 13   | 11.9 | 12.8 | 12.9 | 13.7 | 16   | 15.8 | 14.2 | 16.3 | 17.2 | 17.1 | 16.1 |

Table S2 – Continuation.

| Campaign | Sample   | Tm   | Yb   | Lu   | ΣREE   | REO    | L/H  | Critical | Uncritical | Excessive | La <sub>N</sub> /Lu <sub>N</sub> | La <sub>N</sub> /Sm <sub>N</sub> | Gd <sub>N</sub> /Lu <sub>N</sub> | Y <sub>N</sub> /Ho <sub>N</sub> | Eu <sub>N</sub> /Eu* | Ce <sub>N</sub> /Ce <sub>N</sub> * | Gd <sub>N</sub> /Gd <sub>N</sub> * | REYdef, rel% | C <sub>outl</sub> |
|----------|----------|------|------|------|--------|--------|------|----------|------------|-----------|----------------------------------|----------------------------------|----------------------------------|---------------------------------|----------------------|------------------------------------|------------------------------------|--------------|-------------------|
| S1       | BA       | 0.45 | 3.02 | 0.45 | 189.73 | 228.09 | 7.54 | 69.25    | 51.27      | 69.21     | 0.73                             | 0.94                             | 0.90                             | 1.15                            | 1.06                 | 0.95                               | 1.09                               | 36.50        | 1.00              |
|          | ECO      | 0.37 | 2.38 | 0.38 | 159.94 | 192.28 | 7.48 | 58.23    | 44.31      | 57.40     | 0.76                             | 0.92                             | 0.89                             | 1.13                            | 1.02                 | 0.93                               | 1.06                               | 36.41        | 1.01              |
|          | ESP12    | 0.45 | 2.87 | 0.46 | 193.32 | 232.42 | 7.60 | 69.57    | 52.95      | 70.80     | 0.75                             | 0.93                             | 0.86                             | 1.13                            | 1.01                 | 0.95                               | 1.08                               | 35.99        | 0.98              |
|          | ESP15    | 0.42 | 2.75 | 0.43 | 178.19 | 214.17 | 7.65 | 62.71    | 49.43      | 66.05     | 0.75                             | 0.94                             | 0.84                             | 1.08                            | 1.11                 | 0.95                               | 1.05                               | 35.19        | 0.95              |
|          | ESP22    | 0.45 | 3.05 | 0.45 | 194.53 | 233.84 | 7.73 | 69.88    | 53.48      | 71.17     | 0.76                             | 0.87                             | 0.89                             | 1.13                            | 1.00                 | 0.94                               | 1.06                               | 35.92        | 0.98              |
|          | ESP25    | 0.48 | 3.12 | 0.5  | 206.85 | 248.76 | 7.59 | 74.89    | 56.66      | 75.30     | 0.72                             | 0.86                             | 0.89                             | 1.16                            | 1.06                 | 0.95                               | 1.10                               | 36.20        | 0.99              |
|          | ESP32/42 | 0.44 | 2.99 | 0.46 | 191.14 | 229.81 | 7.65 | 69.50    | 52.87      | 68.77     | 0.75                             | 0.91                             | 0.88                             | 1.20                            | 1.01                 | 0.93                               | 1.09                               | 36.36        | 1.01              |
|          | ESP35/45 | 0.43 | 2.96 | 0.46 | 194.37 | 233.67 | 7.78 | 69.96    | 53.42      | 70.99     | 0.75                             | 0.87                             | 0.87                             | 1.11                            | 1.04                 | 0.94                               | 1.06                               | 35.99        | 0.99              |
|          | Silo     | 0.44 | 3.2  | 0.46 | 207.80 | 249.84 | 7.75 | 74.10    | 56.89      | 76.81     | 0.80                             | 0.92                             | 0.93                             | 1.10                            | 1.09                 | 0.95                               | 1.08                               | 35.66        | 0.96              |
| S2       | ECO      | 0.45 | 2.9  | 0.44 | 169.79 | 204.38 | 6.55 | 65.51    | 44.72      | 59.56     | 0.64                             | 0.84                             | 0.87                             | 1.24                            | 1.03                 | 0.95                               | 1.09                               | 38.58        | 1.10              |
|          | ESP12    | 0.59 | 3.77 | 0.58 | 220.24 | 265.18 | 6.09 | 88.11    | 57.71      | 74.42     | 0.63                             | 0.83                             | 0.88                             | 1.13                            | 1.06                 | 0.93                               | 1.11                               | 40.01        | 1.18              |
|          | ESP22    | 0.66 | 4.34 | 0.65 | 258.46 | 311.12 | 6.23 | 102.61   | 68.03      | 87.82     | 0.66                             | 0.86                             | 0.95                             | 1.14                            | 1.13                 | 0.92                               | 1.16                               | 39.70        | 1.17              |
|          | ESP32/42 | 0.59 | 3.98 | 0.6  | 255.82 | 307.62 | 7.11 | 96.12    | 70.21      | 89.49     | 0.75                             | 0.89                             | 0.95                             | 1.17                            | 1.08                 | 0.91                               | 1.12                               | 37.57        | 1.07              |
|          | Silo     | 0.6  | 3.81 | 0.58 | 221.64 | 266.75 | 6.06 | 87.52    | 59.12      | 75.00     | 0.64                             | 0.82                             | 0.92                             | 1.16                            | 1.03                 | 0.92                               | 1.13                               | 39.49        | 1.17              |
| S3       | BA       | 0.5  | 3.28 | 0.49 | 197.48 | 237.53 | 6.86 | 73.56    | 53.39      | 70.53     | 0.69                             | 0.88                             | 0.90                             | 1.11                            | 1.05                 | 0.94                               | 1.12                               | 37.25        | 1.04              |
|          | ESP12    | 0.52 | 3.38 | 0.53 | 219.08 | 263.65 | 6.88 | 82.65    | 58.95      | 77.48     | 0.71                             | 0.87                             | 0.90                             | 1.19                            | 1.05                 | 0.95                               | 1.10                               | 37.73        | 1.07              |
|          | ESP22    | 0.56 | 3.67 | 0.56 | 237.46 | 285.65 | 6.94 | 90.00    | 64.19      | 83.27     | 0.73                             | 0.85                             | 0.94                             | 1.15                            | 1.06                 | 0.93                               | 1.11                               | 37.90        | 1.08              |
|          | ESP32    | 0.58 | 4.04 | 0.6  | 266.07 | 319.91 | 7.40 | 97.17    | 74.43      | 94.47     | 0.80                             | 0.91                             | 0.97                             | 1.15                            | 1.12                 | 0.91                               | 1.12                               | 36.52        | 1.03              |
|          | Silo     | 0.5  | 3.34 | 0.51 | 213.72 | 257.04 | 7.12 | 78.74    | 58.13      | 76.85     | 0.73                             | 0.89                             | 0.91                             | 1.13                            | 1.05                 | 0.95                               | 1.11                               | 36.84        | 1.02              |
| S4       | BA       | 0.48 | 3.28 | 0.49 | 199.15 | 239.49 | 7.03 | 73.52    | 53.64      | 71.99     | 0.69                             | 0.85                             | 0.91                             | 1.10                            | 1.06                 | 0.96                               | 1.13                               | 36.92        | 1.02              |
|          | ECO      | 0.42 | 2.8  | 0.45 | 182.33 | 219.32 | 7.24 | 67.40    | 49.27      | 65.66     | 0.70                             | 0.88                             | 0.87                             | 1.18                            | 1.03                 | 0.95                               | 1.10                               | 36.97        | 1.03              |
|          | ESP12    | 0.49 | 3.21 | 0.49 | 205.09 | 246.73 | 7.22 | 76.26    | 55.36      | 73.47     | 0.72                             | 0.86                             | 0.90                             | 1.13                            | 1.03                 | 0.95                               | 1.08                               | 37.18        | 1.04              |
|          | ESP22    | 0.53 | 3.44 | 0.54 | 227.96 | 274.12 | 7.30 | 84.77    | 62.46      | 80.73     | 0.75                             | 0.92                             | 0.90                             | 1.10                            | 1.09                 | 0.92                               | 1.11                               | 37.19        | 1.05              |
|          | ESP32    | 0.59 | 3.94 | 0.61 | 257.14 | 309.17 | 7.15 | 95.42    | 70.35      | 91.37     | 0.74                             | 0.86                             | 0.93                             | 1.14                            | 1.10                 | 0.93                               | 1.13                               | 37.11        | 1.04              |
|          | Silo     | 0.53 | 3.36 | 0.51 | 217.18 | 261.27 | 7.24 | 80.41    | 58.69      | 78.08     | 0.73                             | 0.87                             | 0.94                             | 1.19                            | 1.03                 | 0.95                               | 1.12                               | 37.02        | 1.03              |
| Minimum  |          | 0.37 | 2.38 | 0.38 | 159.34 | 192.28 | 6.06 | 58.23    | 44.31      | 57.40     | 0.63                             | 0.82                             | 0.84                             | 1.08                            | 1.00                 | 0.91                               | 1.05                               | 35.19        | 0.95              |
| Average  |          | 0.5  | 3.32 | 0.51 | 210.58 | 253.27 | 7.17 | 78.31    | 57.20      | 75.07     | 0.72                             | 0.88                             | 0.90                             | 1.14                            | 1.06                 | 0.94                               | 1.10                               | 37.13        | 1.04              |
| Maximum  |          | 0.66 | 4.34 | 0.65 | 274.52 | 319.91 | 7.78 | 102.61   | 74.43      | 94.47     | 0.80                             | 0.94                             | 0.97                             | 1.24                            | 1.13                 | 0.96                               | 1.16                               | 40.01        | 1.18              |
| CV (%)   |          | 14.1 | 13.9 | 13   | 218.11 | 13.11  | 6.90 | 14.72    | 13.17      | 11.95     | 6.15                             | 3.75                             | 3.37                             | 3.11                            | 3.26                 | 1.48                               | 2.42                               | 3.26         | 5.77              |

BA, bottom ash; ECO, economizer; ESP, Electrostatic precipitator; CV, coefficient of variations; REO, rare earth elements as oxides; L/H, ratio between light REE and heavy REE; REYdef, rel%,  $(Y+Nd+Eu+Tb+Dy+Er)/\Sigma REE$ ; Coutl,  $((Nd+Eu+Tb+Dy+Er+Y)/\Sigma REE)/((Ce+Ho+Tm+Yb+Lu)/\Sigma REE)$

Table S3 – Relative enrichments (RE) for trace elements according to Meij [39].

| Campaign | Sample   | Ba  | Be  | Co  | Cs  | Ga  | Hf  | Nb  | Rb  | Sn  | Sr  | Ta  | Th  | U   | V   | W   | Zr  | REE |
|----------|----------|-----|-----|-----|-----|-----|-----|-----|-----|-----|-----|-----|-----|-----|-----|-----|-----|-----|
| S1       | BA       | 0.6 | 0.2 | 0.4 | 4.3 | 1.8 | 0.9 | 7.7 | 2.0 | 0.1 | 0.2 | 0.6 | 1.2 | 0.5 | 1.7 | 0.2 | 1.0 | 0.9 |
|          | ECO      | 0.5 | 0.1 | 0.4 | 3.3 | 1.6 | 0.8 | 6.0 | 1.6 | 0.1 | 0.2 | 0.5 | 1.0 | 0.4 | 1.4 | 0.1 | 1.0 | 0.8 |
|          | ESP12    | 0.6 | 0.2 | 0.5 | 4.7 | 2.8 | 0.8 | 7.9 | 2.2 | 0.4 | 0.3 | 0.7 | 1.1 | 0.6 | 1.9 | 0.6 | 0.9 | 0.9 |
|          | ESP15    | 0.5 | 0.3 | 0.5 | 4.1 | 2.4 | 0.8 | 7.1 | 1.9 | 0.2 | 0.3 | 0.5 | 1.1 | 0.5 | 1.7 | 0.2 | 0.8 | 0.8 |
|          | ESP22    | 0.6 | 0.3 | 0.5 | 5.1 | 3.2 | 0.8 | 7.9 | 2.3 | 0.2 | 0.3 | 0.5 | 1.2 | 0.6 | 2.1 | 0.3 | 0.8 | 0.9 |
|          | ESP25    | 0.6 | 0.3 | 0.5 | 4.8 | 3.3 | 0.8 | 8.6 | 2.1 | 0.2 | 0.3 | 0.5 | 1.3 | 0.6 | 2.2 | 0.3 | 0.9 | 1.0 |
|          | ESP32/42 | 0.6 | 0.2 | 0.4 | 4.7 | 2.7 | 0.8 | 7.6 | 2.2 | 0.1 | 0.3 | 0.6 | 1.1 | 0.5 | 1.8 | 0.2 | 0.9 | 0.9 |
|          | ESP35/45 | 0.6 | 0.2 | 0.5 | 4.8 | 3.0 | 0.8 | 7.9 | 2.1 | 0.2 | 0.3 | 0.6 | 1.2 | 0.6 | 2.0 | 0.3 | 0.9 | 0.9 |
|          | Silo     | 0.7 | 0.2 | 0.5 | 5.4 | 3.2 | 0.8 | 8.3 | 2.4 | 0.2 | 0.3 | 0.6 | 1.3 | 0.7 | 2.2 | 0.3 | 0.9 | 1.0 |
| S2       | ECO      | 0.5 | 0.6 | 0.7 | 0.7 | 0.9 | 0.8 | 0.7 | 0.6 | 0.2 | 0.6 | 1.1 | 0.7 | 0.5 | 0.8 | 0.2 | 0.9 | 0.6 |
|          | ESP12    | 0.9 | 0.6 | 0.9 | 1.0 | 2.2 | 0.9 | 1.0 | 0.9 | 0.5 | 0.9 | 1.4 | 0.9 | 0.8 | 1.3 | 0.6 | 0.9 | 0.8 |
|          | ESP22    | 1.2 | 1.6 | 1.2 | 1.1 | 3.9 | 0.8 | 1.1 | 1.0 | 0.8 | 1.2 | 1.4 | 1.0 | 1.0 | 1.7 | 0.9 | 0.9 | 1.0 |
|          | ESP32/42 | 0.9 | 1.1 | 1.0 | 1.2 | 3.8 | 0.8 | 1.1 | 1.2 | 0.9 | 0.8 | 1.6 | 1.1 | 1.1 | 1.8 | 1.0 | 0.8 | 1.0 |
|          | Silo     | 0.9 | 1.1 | 0.9 | 1.0 | 2.2 | 0.8 | 1.0 | 0.9 | 0.5 | 0.9 | 1.3 | 1.0 | 0.8 | 1.2 | 0.7 | 0.9 | 0.8 |
| S3       | BA       | 0.7 | 0.8 | 0.6 | 1.1 | 1.0 | 1.3 | 0.9 | 1.0 | 0.2 | 0.7 | 1.5 | 1.1 | 0.8 | 0.7 | 0.4 | 1.1 | 0.9 |
|          | ESP12    | 0.9 | 0.8 | 0.8 | 1.3 | 1.9 | 1.3 | 1.0 | 1.2 | 0.6 | 0.9 | 1.5 | 1.3 | 1.0 | 1.0 | 0.8 | 1.1 | 1.0 |
|          | ESP22    | 1.0 | 0.6 | 1.0 | 1.4 | 2.7 | 1.2 | 1.1 | 1.2 | 0.8 | 1.0 | 1.9 | 1.4 | 1.3 | 1.2 | 1.2 | 1.0 | 1.1 |
|          | ESP32    | 1.2 | 1.4 | 1.1 | 1.5 | 4.0 | 1.2 | 1.2 | 1.3 | 1.4 | 1.2 | 2.1 | 1.6 | 1.8 | 1.5 | 1.9 | 1.0 | 1.2 |
|          | Silo     | 0.9 | 0.8 | 0.8 | 1.3 | 2.1 | 1.2 | 1.0 | 1.1 | 0.6 | 0.9 | 1.7 | 1.2 | 1.1 | 1.0 | 1.0 | 1.0 | 1.0 |
| S4       | BA       | 0.7 | 0.6 | 0.7 | 0.9 | 1.6 | 1.0 | 1.1 | 0.9 | 0.1 | 0.8 | 1.7 | 1.1 | 0.7 | 1.1 | 0.5 | 1.1 | 0.9 |
|          | ECO      | 0.6 | 1.0 | 0.7 | 0.8 | 1.4 | 0.9 | 1.0 | 0.8 | 0.1 | 0.7 | 1.1 | 1.0 | 0.7 | 1.0 | 0.5 | 1.0 | 0.8 |
|          | ESP12    | 0.8 | 0.8 | 0.8 | 1.0 | 2.9 | 0.8 | 1.1 | 1.0 | 0.4 | 0.9 | 1.7 | 1.1 | 1.0 | 1.3 | 0.7 | 0.9 | 0.9 |
|          | ESP22    | 1.0 | 1.5 | 1.0 | 1.1 | 4.4 | 0.8 | 1.3 | 1.2 | 0.8 | 1.0 | 1.9 | 1.3 | 1.3 | 1.7 | 1.5 | 0.9 | 1.0 |
|          | ESP32    | 1.2 | 1.7 | 1.2 | 1.2 | 6.0 | 0.8 | 1.3 | 1.2 | 1.1 | 1.2 | 1.9 | 1.5 | 1.6 | 2.1 | 2.3 | 1.0 | 1.2 |
|          | Silo     | 0.9 | 0.4 | 0.9 | 1.1 | 3.1 | 0.8 | 1.2 | 1.1 | 0.6 | 0.9 | 1.9 | 1.2 | 1.0 | 1.4 | 1.8 | 1.0 | 1.0 |

BA, bottom ash; ECO, economizer; ESP, Electrostatic precipitator; REE, rare earth elements;

Table S4 - Pearson correlation coefficients for feed coals. Statistically significant relations for  $\rho > 0.05$  in bold.

|                                | C            | Ash         | SiO <sub>2</sub> | Al <sub>2</sub> O <sub>3</sub> | Fe <sub>2</sub> O <sub>3</sub> | SO <sub>3</sub> | K <sub>2</sub> O | CaO         | TiO <sub>2</sub> | Ba          | Co          | Cs          | Hf          | Nb          | Rb          | Sr   | Th          | U           | Zr          | LREE        | MREE        | HREE |
|--------------------------------|--------------|-------------|------------------|--------------------------------|--------------------------------|-----------------|------------------|-------------|------------------|-------------|-------------|-------------|-------------|-------------|-------------|------|-------------|-------------|-------------|-------------|-------------|------|
| C                              | 1.00         |             |                  |                                |                                |                 |                  |             |                  |             |             |             |             |             |             |      |             |             |             |             |             |      |
| Ash                            | <b>-0.86</b> | 1.00        |                  |                                |                                |                 |                  |             |                  |             |             |             |             |             |             |      |             |             |             |             |             |      |
| SiO <sub>2</sub>               | <b>-0.76</b> | <b>0.94</b> | 1.00             |                                |                                |                 |                  |             |                  |             |             |             |             |             |             |      |             |             |             |             |             |      |
| Al <sub>2</sub> O <sub>3</sub> | <b>-0.76</b> | <b>0.94</b> | <b>0.93</b>      | 1.00                           |                                |                 |                  |             |                  |             |             |             |             |             |             |      |             |             |             |             |             |      |
| Fe <sub>2</sub> O <sub>3</sub> | <b>-0.91</b> | 0.64        | 0.51             | 0.53                           | 1.00                           |                 |                  |             |                  |             |             |             |             |             |             |      |             |             |             |             |             |      |
| SO <sub>3</sub>                | -0.47        | 0.08        | 0.10             | 0.00                           | 0.50                           | 1.00            |                  |             |                  |             |             |             |             |             |             |      |             |             |             |             |             |      |
| K <sub>2</sub> O               | -0.65        | <b>0.89</b> | <b>0.88</b>      | <b>0.99</b>                    | 0.41                           | -0.10           | 1.00             |             |                  |             |             |             |             |             |             |      |             |             |             |             |             |      |
| CaO                            | <b>-0.81</b> | 0.64        | 0.40             | 0.60                           | <b>0.85</b>                    | 0.25            | 0.54             | 1.00        |                  |             |             |             |             |             |             |      |             |             |             |             |             |      |
| TiO <sub>2</sub>               | -0.73        | <b>0.81</b> | <b>0.81</b>      | <b>0.89</b>                    | 0.46                           | 0.32            | <b>0.89</b>      | 0.56        | 1.00             |             |             |             |             |             |             |      |             |             |             |             |             |      |
| Ba                             | <b>-0.87</b> | 0.58        | 0.38             | 0.39                           | <b>0.87</b>                    | 0.58            | 0.26             | <b>0.80</b> | 0.42             | 1.00        |             |             |             |             |             |      |             |             |             |             |             |      |
| Co                             | <b>-0.83</b> | <b>0.84</b> | <b>0.79</b>      | 0.70                           | 0.59                           | 0.19            | 0.60             | 0.51        | 0.60             | 0.71        | 1.00        |             |             |             |             |      |             |             |             |             |             |      |
| Cs                             | <b>-0.78</b> | <b>0.87</b> | <b>0.82</b>      | <b>0.89</b>                    | 0.48                           | 0.15            | <b>0.87</b>      | 0.61        | <b>0.91</b>      | 0.54        | <b>0.82</b> | 1.00        |             |             |             |      |             |             |             |             |             |      |
| Hf                             | -0.53        | 0.65        | 0.61             | 0.72                           | 0.19                           | 0.21            | 0.75             | 0.43        | <b>0.91</b>      | 0.34        | 0.56        | <b>0.90</b> | 1.00        |             |             |      |             |             |             |             |             |      |
| Nb                             | <b>-0.94</b> | <b>0.95</b> | <b>0.90</b>      | <b>0.90</b>                    | <b>0.76</b>                    | 0.23            | <b>0.82</b>      | 0.71        | <b>0.80</b>      | 0.70        | <b>0.90</b> | <b>0.89</b> | 0.63        | 1.00        |             |      |             |             |             |             |             |      |
| Rb                             | <b>-0.80</b> | <b>0.95</b> | <b>0.89</b>      | <b>0.98</b>                    | 0.56                           | 0.09            | <b>0.97</b>      | 0.66        | <b>0.93</b>      | 0.48        | 0.73        | <b>0.94</b> | <b>0.81</b> | <b>0.91</b> | 1.00        |      |             |             |             |             |             |      |
| Sr                             | -0.63        | 0.19        | 0.01             | 0.03                           | 0.75                           | 0.64            | -0.10            | 0.68        | 0.13             | <b>0.90</b> | 0.44        | 0.24        | 0.08        | 0.40        | 0.13        | 1.00 |             |             |             |             |             |      |
| Th                             | <b>-0.84</b> | <b>0.81</b> | <b>0.77</b>      | <b>0.81</b>                    | 0.58                           | 0.44            | <b>0.76</b>      | 0.63        | <b>0.93</b>      | 0.66        | <b>0.79</b> | <b>0.95</b> | <b>0.89</b> | <b>0.87</b> | <b>0.88</b> | 0.40 | 1.00        |             |             |             |             |      |
| U                              | <b>-0.91</b> | <b>0.82</b> | 0.74             | <b>0.83</b>                    | 0.72                           | 0.44            | <b>0.77</b>      | <b>0.78</b> | <b>0.91</b>      | 0.73        | 0.75        | <b>0.92</b> | <b>0.81</b> | <b>0.90</b> | <b>0.89</b> | 0.50 | <b>0.97</b> | 1.00        |             |             |             |      |
| Zr                             | <b>-0.86</b> | <b>0.82</b> | <b>0.78</b>      | <b>0.76</b>                    | 0.59                           | 0.50            | 0.69             | 0.57        | <b>0.88</b>      | 0.71        | <b>0.85</b> | <b>0.91</b> | <b>0.83</b> | <b>0.86</b> | <b>0.84</b> | 0.44 | <b>0.98</b> | <b>0.93</b> | 1.00        |             |             |      |
| LREE                           | <b>-0.88</b> | <b>0.92</b> | <b>0.89</b>      | <b>0.92</b>                    | 0.63                           | 0.33            | <b>0.87</b>      | 0.65        | <b>0.95</b>      | 0.62        | <b>0.81</b> | <b>0.95</b> | <b>0.83</b> | <b>0.94</b> | <b>0.96</b> | 0.30 | <b>0.97</b> | <b>0.95</b> | <b>0.95</b> | 1.00        |             |      |
| MREE                           | <b>-0.94</b> | <b>0.84</b> | <b>0.76</b>      | 0.73                           | 0.72                           | 0.52            | 0.64             | 0.67        | <b>0.80</b>      | <b>0.83</b> | <b>0.88</b> | <b>0.87</b> | 0.72        | <b>0.90</b> | <b>0.81</b> | 0.57 | <b>0.94</b> | <b>0.92</b> | <b>0.98</b> | <b>0.93</b> | 1.00        |      |
| HREE                           | <b>-0.87</b> | <b>0.80</b> | 0.69             | 0.70                           | 0.62                           | 0.42            | 0.63             | 0.67        | <b>0.78</b>      | <b>0.81</b> | <b>0.88</b> | <b>0.90</b> | <b>0.79</b> | <b>0.85</b> | <b>0.79</b> | 0.56 | <b>0.94</b> | <b>0.91</b> | <b>0.96</b> | <b>0.90</b> | <b>0.97</b> | 1.00 |

LREE, light rare earth elements (La-Sm), MREE, medium rare earth elements (Eu-Y), HREE, heavy earth elements (Ho-Lu)







Table S6 – Continuation.

| Sample          | Fraction    | Er   | Tm   | Yb   | Lu   | ΣREE   | REO    | L/H  | Critical | Uncritical | Excessive | EF   | Recovery | La <sub>N</sub> /<br>Lu <sub>N</sub> | La <sub>N</sub> /<br>Sm <sub>N</sub> | Gd <sub>N</sub> /<br>Lu <sub>N</sub> | Y <sub>N</sub> /<br>Ho <sub>N</sub> | Eu <sub>N</sub> /<br>Eu* | Ce <sub>N</sub> /<br>Ce <sub>N</sub> * | Gd <sub>N</sub> /<br>Gd <sub>N</sub> * | REYdef,<br>rel% | C <sub>out</sub> |
|-----------------|-------------|------|------|------|------|--------|--------|------|----------|------------|-----------|------|----------|--------------------------------------|--------------------------------------|--------------------------------------|-------------------------------------|--------------------------|----------------------------------------|----------------------------------------|-----------------|------------------|
| S1 BA<br>(mm)   | >4          | 3.25 | 0.47 | 3.03 | 0.46 | 195.7  | 235.34 | 7.16 | 72.15    | 52.91      | 70.64     | 0.98 | 19.07    | 0.72                                 | 0.82                                 | 0.94                                 | 1.14                                | 1.00                     | 0.95                                   | 1.09                                   | 36.87           | 1.02             |
|                 | 4-2         | 3.41 | 0.48 | 3.23 | 0.5  | 206.83 | 248.72 | 7.26 | 76.62    | 55.70      | 74.51     | 1.04 | 19.77    | 0.70                                 | 0.86                                 | 0.92                                 | 1.18                                | 1.07                     | 0.95                                   | 1.14                                   | 37.04           | 1.03             |
|                 | 2-1         | 3.31 | 0.49 | 3.17 | 0.5  | 207.22 | 249.30 | 7.31 | 77.13    | 55.84      | 74.25     | 1.04 | 13.46    | 0.71                                 | 0.85                                 | 0.91                                 | 1.13                                | 1.06                     | 0.94                                   | 1.10                                   | 37.22           | 1.04             |
|                 | 1-0.5       | 3.47 | 0.48 | 3.22 | 0.49 | 208    | 250.17 | 7.39 | 75.25    | 56.47      | 76.28     | 1.04 | 7.61     | 0.73                                 | 0.84                                 | 0.92                                 | 1.18                                | 0.99                     | 0.96                                   | 1.09                                   | 36.18           | 0.99             |
|                 | 0.5-0.25    | 3.27 | 0.47 | 3.01 | 0.5  | 201.42 | 242.19 | 7.48 | 73.72    | 54.13      | 73.57     | 1.01 | 6.04     | 0.68                                 | 0.83                                 | 0.89                                 | 1.12                                | 1.03                     | 0.96                                   | 1.11                                   | 36.60           | 1.00             |
|                 | 0.25-0.125  | 3.12 | 0.42 | 2.88 | 0.44 | 184.66 | 222.06 | 7.24 | 67.25    | 50.33      | 67.08     | 0.93 | 7.91     | 0.73                                 | 0.85                                 | 0.94                                 | 1.10                                | 1.05                     | 0.95                                   | 1.11                                   | 36.42           | 1.00             |
|                 | 0.125-0.090 | 3.13 | 0.45 | 2.83 | 0.44 | 187.45 | 225.34 | 7.24 | 68.52    | 51.25      | 67.68     | 0.94 | 5.69     | 0.73                                 | 0.81                                 | 0.97                                 | 1.08                                | 0.99                     | 0.95                                   | 1.12                                   | 36.55           | 1.01             |
|                 | 0.090-0.063 | 3.23 | 0.44 | 2.95 | 0.47 | 193.16 | 232.33 | 7.33 | 70.55    | 51.99      | 70.62     | 0.97 | 6.35     | 0.70                                 | 0.85                                 | 0.89                                 | 1.13                                | 1.07                     | 0.96                                   | 1.10                                   | 36.52           | 1.00             |
|                 | <0.063      | 3.22 | 0.47 | 3.03 | 0.47 | 199.03 | 239.32 | 7.36 | 73.01    | 54.66      | 71.36     | 1.00 | 14.11    | 0.74                                 | 0.86                                 | 0.92                                 | 1.14                                | 1.02                     | 0.93                                   | 1.11                                   | 36.68           | 1.02             |
| S1 Eco<br>(µm)  | > 150       | 2.97 | 0.44 | 2.88 | 0.45 | 188.09 | 226.23 | 7.29 | 69.35    | 50.72      | 68.02     | 1.13 | 23.43    | 0.71                                 | 0.86                                 | 0.92                                 | 1.13                                | 1.03                     | 0.95                                   | 1.12                                   | 36.87           | 1.02             |
|                 | 150-75      | 1.99 | 0.27 | 1.81 | 0.28 | 112.72 | 135.60 | 6.81 | 42.67    | 30.32      | 39.73     | 0.68 | 18.78    | 0.69                                 | 0.88                                 | 0.90                                 | 1.13                                | 1.07                     | 0.92                                   | 1.12                                   | 37.85           | 1.07             |
|                 | 75-45       | 2.96 | 0.41 | 2.66 | 0.43 | 166.51 | 200.28 | 6.85 | 63.56    | 44.59      | 58.36     | 1.00 | 24.96    | 0.65                                 | 0.83                                 | 0.86                                 | 1.16                                | 1.03                     | 0.93                                   | 1.08                                   | 38.17           | 1.09             |
|                 | 45-25       | 3.28 | 0.49 | 3.15 | 0.48 | 196.1  | 235.92 | 7.15 | 73.29    | 52.71      | 70.10     | 1.18 | 19.74    | 0.69                                 | 0.81                                 | 0.89                                 | 1.19                                | 0.98                     | 0.95                                   | 1.09                                   | 37.37           | 1.05             |
|                 | <25         | 3.64 | 0.54 | 3.5  | 0.53 | 222.56 | 267.73 | 7.14 | 83.23    | 60.41      | 78.92     | 1.34 | 13.09    | 0.72                                 | 0.86                                 | 0.91                                 | 1.17                                | 1.04                     | 0.93                                   | 1.09                                   | 37.40           | 1.05             |
| S1 ESP12        | >75         | 1.85 | 0.26 | 1.73 | 0.27 | 124.04 | 149.14 | 7.87 | 44.36    | 34.07      | 45.61     | 0.64 | 5.22     | 0.81                                 | 0.88                                 | 0.99                                 | 1.12                                | 1.04                     | 0.95                                   | 1.13                                   | 35.76           | 0.97             |
|                 | 75-45       | 2.69 | 0.37 | 2.59 | 0.39 | 167.49 | 201.41 | 7.47 | 61.26    | 45.61      | 60.62     | 0.86 | 11.02    | 0.74                                 | 0.85                                 | 0.92                                 | 1.19                                | 1.04                     | 0.94                                   | 1.10                                   | 36.58           | 1.01             |
|                 | 45-25       | 3.1  | 0.44 | 2.98 | 0.47 | 202.53 | 243.59 | 7.66 | 73.71    | 55.57      | 73.25     | 1.04 | 38.33    | 0.76                                 | 0.89                                 | 0.93                                 | 1.19                                | 1.01                     | 0.94                                   | 1.13                                   | 36.39           | 1.01             |
|                 | <25         | 3.48 | 0.49 | 3.21 | 0.49 | 217.05 | 260.99 | 7.53 | 79.62    | 59.58      | 77.85     | 1.12 | 45.44    | 0.77                                 | 0.84                                 | 0.95                                 | 1.16                                | 1.00                     | 0.93                                   | 1.09                                   | 36.68           | 1.02             |
|                 | 45-25 ws    | 2.79 | 0.41 | 2.75 | 0.41 | 179.68 | 216.00 | 7.48 | 65.65    | 49.43      | 64.60     | 0.91 | 5.89     | 0.77                                 | 0.85                                 | 0.95                                 | 1.18                                | 1.05                     | 0.93                                   | 1.09                                   | 36.54           | 1.02             |
|                 | <25 ws      | 3.33 | 0.49 | 3.18 | 0.48 | 212.12 | 255.02 | 7.56 | 77.79    | 58.06      | 76.27     | 1.09 | 78.03    | 0.77                                 | 0.84                                 | 0.95                                 | 1.16                                | 1.02                     | 0.93                                   | 1.08                                   | 36.67           | 1.02             |
| S1 ESP15        | >75         | 1.65 | 0.23 | 1.49 | 0.24 | 104.16 | 125.26 | 7.38 | 37.69    | 28.82      | 37.65     | 0.56 | 6.04     | 0.77                                 | 0.90                                 | 0.95                                 | 1.09                                | 1.05                     | 0.93                                   | 1.10                                   | 36.18           | 1.00             |
|                 | 75-45       | 2.45 | 0.33 | 2.27 | 0.35 | 148.67 | 178.71 | 7.35 | 53.59    | 40.60      | 54.48     | 0.79 | 12.17    | 0.73                                 | 0.84                                 | 0.95                                 | 1.06                                | 1.03                     | 0.96                                   | 1.10                                   | 36.05           | 0.98             |
|                 | 45-25       | 3.1  | 0.45 | 3.06 | 0.45 | 194.8  | 234.31 | 7.34 | 71.66    | 53.39      | 69.75     | 1.04 | 33.47    | 0.76                                 | 0.89                                 | 0.97                                 | 1.15                                | 1.06                     | 0.93                                   | 1.16                                   | 36.79           | 1.03             |
|                 | <25         | 3.71 | 0.53 | 3.58 | 0.54 | 231.6  | 278.46 | 7.34 | 84.43    | 63.67      | 83.50     | 1.24 | 48.32    | 0.75                                 | 0.86                                 | 0.94                                 | 1.14                                | 1.03                     | 0.93                                   | 1.10                                   | 36.46           | 1.01             |
|                 | 45-25 ws    | 3.12 | 0.44 | 2.88 | 0.46 | 185.44 | 222.98 | 7.15 | 68.46    | 50.80      | 66.18     | 0.97 | 8.76     | 0.70                                 | 0.84                                 | 0.88                                 | 1.17                                | 1.02                     | 0.92                                   | 1.10                                   | 36.92           | 1.03             |
|                 | <25 ws      | 3.42 | 0.52 | 3.35 | 0.52 | 218.07 | 262.29 | 7.41 | 79.91    | 59.70      | 78.46     | 1.14 | 73.33    | 0.73                                 | 0.88                                 | 0.91                                 | 1.18                                | 1.06                     | 0.94                                   | 1.09                                   | 36.64           | 1.02             |
| S1 ESP22        | >75         | 2.06 | 0.29 | 1.96 | 0.3  | 125.58 | 150.96 | 7.26 | 46.36    | 34.86      | 44.36     | 0.59 | 4.80     | 0.74                                 | 0.88                                 | 0.93                                 | 1.11                                | 1.04                     | 0.91                                   | 1.13                                   | 36.92           | 1.05             |
|                 | 75-45       | 2.69 | 0.38 | 2.48 | 0.38 | 170.15 | 204.44 | 7.77 | 60.59    | 48.04      | 61.52     | 0.80 | 10.46    | 0.81                                 | 0.87                                 | 0.96                                 | 1.11                                | 1.05                     | 0.92                                   | 1.09                                   | 35.61           | 0.98             |
|                 | 45-25       | 3.66 | 0.51 | 3.29 | 0.51 | 222.79 | 267.77 | 7.52 | 80.87    | 61.30      | 80.62     | 1.04 | 37.07    | 0.76                                 | 0.86                                 | 0.95                                 | 1.09                                | 1.06                     | 0.93                                   | 1.12                                   | 36.30           | 1.00             |
|                 | <25         | 3.97 | 0.57 | 3.66 | 0.57 | 243.52 | 292.76 | 7.38 | 88.04    | 66.83      | 88.65     | 1.14 | 47.67    | 0.75                                 | 0.88                                 | 0.94                                 | 1.09                                | 1.09                     | 0.94                                   | 1.13                                   | 36.15           | 0.99             |
| S1 ESP25        | >75         | 2.35 | 0.34 | 2.2  | 0.35 | 144.14 | 173.22 | 7.46 | 51.62    | 40.52      | 52.00     | 0.70 | 7.46     | 0.74                                 | 0.87                                 | 0.89                                 | 1.05                                | 1.03                     | 0.91                                   | 1.09                                   | 35.81           | 0.99             |
|                 | 75-45       | 2.68 | 0.39 | 2.51 | 0.4  | 164.82 | 198.17 | 7.36 | 60.35    | 44.99      | 59.48     | 0.80 | 11.47    | 0.71                                 | 0.84                                 | 0.92                                 | 1.15                                | 1.05                     | 0.94                                   | 1.12                                   | 36.62           | 1.01             |
|                 | 45-25       | 3.43 | 0.48 | 3.08 | 0.5  | 207.94 | 250.01 | 7.27 | 75.79    | 57.42      | 74.73     | 1.02 | 35.90    | 0.73                                 | 0.88                                 | 0.93                                 | 1.10                                | 1.08                     | 0.92                                   | 1.15                                   | 36.45           | 1.01             |
|                 | <25         | 3.97 | 0.57 | 3.65 | 0.57 | 240.51 | 289.09 | 7.26 | 86.30    | 66.06      | 88.15     | 1.17 | 45.17    | 0.73                                 | 0.86                                 | 0.96                                 | 1.04                                | 1.06                     | 0.95                                   | 1.15                                   | 35.88           | 0.98             |
| S1 ESP<br>32/42 | >75         | 2.01 | 0.3  | 2.01 | 0.3  | 127.71 | 153.53 | 7.62 | 44.43    | 35.60      | 47.68     | 0.68 | 7.11     | 0.77                                 | 0.91                                 | 0.90                                 | 1.10                                | 1.05                     | 0.96                                   | 1.06                                   | 34.79           | 0.93             |
|                 | 75-45       | 2.76 | 0.4  | 2.6  | 0.42 | 173.77 | 208.92 | 7.56 | 62.37    | 47.73      | 63.67     | 0.92 | 14.92    | 0.73                                 | 0.89                                 | 0.90                                 | 1.09                                | 1.07                     | 0.94                                   | 1.10                                   | 35.89           | 0.98             |
|                 | 45-25       | 3.3  | 0.46 | 3.01 | 0.47 | 201.79 | 242.52 | 7.44 | 72.94    | 55.79      | 73.06     | 1.07 | 35.03    | 0.75                                 | 0.84                                 | 0.95                                 | 1.07                                | 1.03                     | 0.93                                   | 1.13                                   | 36.15           | 1.00             |
|                 | <25         | 3.73 | 0.52 | 3.34 | 0.52 | 222.29 | 267.22 | 7.20 | 81.93    | 59.96      | 80.40     | 1.18 | 42.94    | 0.72                                 | 0.83                                 | 0.96                                 | 1.11                                | 1.07                     | 0.95                                   | 1.14                                   | 36.86           | 1.02             |

Table S6 – Continuation.

| Sample          | Fraction    | wt.<br>% | Ct    | Ba   | Be   | Co   | Cs   | Ga   | Hf   | Nb   | Rb    | Sn   | Sr   | Ta   | Th   | U    | V    | W    | Zr    | La   | Ce   | Pr    | Nd   | Sm   | Eu   | Gd   | Tb   | Dy   | Y    | Ho   |
|-----------------|-------------|----------|-------|------|------|------|------|------|------|------|-------|------|------|------|------|------|------|------|-------|------|------|-------|------|------|------|------|------|------|------|------|
| S1 ESP<br>35/45 | >75         | 10.7     | 18.41 | 709  | 2    | 15.3 | 5.4  | 20.1 | 3.4  | 9.8  | 75.5  | 2    | 228  | 0.6  | 9.2  | 4.7  | 196  | 2.2  | 127   | 28.3 | 53.1 | 6.28  | 24   | 4.7  | 1.06 | 4.24 | 0.68 | 3.92 | 22.7 | 0.87 |
|                 | 75-45       | 13.6     | 8.77  | 782  | 2    | 15.5 | 5.9  | 16.6 | 4.7  | 10.9 | 81.9  | 2    | 238  | 0.7  | 11   | 4.7  | 207  | 2    | 173   | 31.2 | 57.7 | 7.15  | 27.9 | 5.17 | 1.18 | 4.88 | 0.78 | 4.73 | 27.4 | 0.97 |
|                 | 45-25       | 23.5     | 4.32  | 797  | 4    | 16.5 | 6.2  | 16.7 | 5.6  | 11.9 | 86    | 2    | 251  | 0.8  | 11.9 | 4.8  | 217  | 2    | 209   | 33.6 | 66.1 | 8.06  | 30.2 | 6.06 | 1.28 | 5.69 | 0.88 | 5.33 | 31.1 | 1.1  |
|                 | <25         | 50.9     | 2.04  | 1022 | 3    | 22.4 | 8.7  | 30   | 5.4  | 14.4 | 107   | 3    | 301  | 1    | 14.2 | 6.5  | 285  | 2.3  | 196   | 41.1 | 78.3 | 9.7   | 37.4 | 7.29 | 1.6  | 6.85 | 1.03 | 6.3  | 36   | 1.3  |
| S4 BA<br>(mm)   | >4          | 38.9     | 0.08  | 915  | 4    | 21   | 6.5  | 13   | 6    | 13.3 | 87.8  | <1   | 293  | 1    | 12.2 | 4.7  | 197  | 3.5  | 219   | 37.1 | 72.3 | 8.35  | 30.8 | 6.25 | 1.37 | 5.79 | 0.94 | 5.61 | 33.7 | 1.13 |
|                 | 4-2         | 19.4     | 0.14  | 1004 | 5    | 21.1 | 6.9  | 14.3 | 5.9  | 13.5 | 91.3  | 1    | 311  | 1    | 12.8 | 5.1  | 214  | 1.1  | 219   | 37.6 | 73.7 | 8.73  | 33.5 | 6.64 | 1.43 | 6.4  | 1.01 | 5.87 | 34.5 | 1.23 |
|                 | 2-1         | 10.7     | 0.17  | 1023 | 2    | 20.7 | 7.1  | 15.3 | 6.1  | 13.6 | 92.6  | 1    | 323  | 0.9  | 12.2 | 5.3  | 223  | 1.8  | 220   | 36.9 | 71.9 | 8.67  | 33   | 6.52 | 1.49 | 6.24 | 1.03 | 6.08 | 36.7 | 1.26 |
|                 | 1-0.5       | 5.09     | 0.19  | 947  | 1    | 18.7 | 6.5  | 14.9 | 5.4  | 13.8 | 83.5  | 1    | 292  | 0.9  | 11.5 | 4.7  | 210  | 1.4  | 206   | 35.9 | 68.5 | 8.36  | 31.9 | 6.25 | 1.36 | 5.97 | 0.93 | 5.54 | 32.6 | 1.16 |
|                 | 0.5-0.25    | 4.57     | 0.45  | 920  | 5    | 18.2 | 6    | 14.2 | 5.4  | 13.4 | 81.5  | 2    | 292  | 0.8  | 11.2 | 4.8  | 204  | 1.7  | 211   | 34.2 | 67   | 8.2   | 30.1 | 5.89 | 1.34 | 5.87 | 0.91 | 5.35 | 32.4 | 1.14 |
|                 | 0.25-0.125  | 6.29     | 0.62  | 869  | 3    | 18.3 | 5.8  | 12.9 | 5.3  | 12   | 76.3  | 1    | 274  | 0.8  | 11.1 | 4.6  | 190  | 1.6  | 189   | 32.9 | 64.5 | 7.92  | 29.2 | 5.86 | 1.28 | 5.55 | 0.89 | 5.34 | 29.5 | 1.12 |
|                 | 0.125-0.090 | 3.38     | 0.37  | 809  | 6    | 16.6 | 5.5  | 11.7 | 4.9  | 11.4 | 73.9  | <1   | 258  | 0.8  | 10.1 | 4.3  | 178  | 1.2  | 186   | 31.7 | 61.4 | 7.46  | 28.5 | 5.38 | 1.24 | 5.32 | 0.85 | 5.15 | 28.9 | 1.08 |
|                 | 0.090-0.063 | 3.93     | 0.32  | 876  | 5    | 17.7 | 5.7  | 11.4 | 5.4  | 12.2 | 77.1  | 1    | 265  | 0.8  | 11.8 | 4.4  | 185  | 1.5  | 198   | 33.1 | 66.6 | 7.99  | 31   | 5.88 | 1.3  | 5.63 | 0.9  | 5.53 | 31.6 | 1.19 |
|                 | <0.063      | 7.58     | 0.48  | 900  | 4    | 18.6 | 5.9  | 13.6 | 5.7  | 12.6 | 81.1  | 1    | 274  | 0.8  | 11.7 | 4.5  | 191  | 1.5  | 209   | 33.6 | 66.3 | 8.02  | 30.6 | 6.03 | 1.34 | 5.83 | 0.89 | 5.5  | 31   | 1.12 |
| S4 ECO<br>(µm)  | > 150       | 13.5     | 7.76  | 888  | 4    | 17.9 | 5.7  | 15.5 | 4.6  | 11.6 | 76.1  | 1    | 291  | 0.8  | 10.5 | 4.7  | 198  | 1.9  | 170   | 32.3 | 62   | 7.59  | 28.7 | 5.45 | 1.29 | 5.4  | 0.86 | 5.37 | 29.7 | 1.08 |
|                 | 150-75      | 27.3     | 9.21  | 638  | 3    | 12.4 | 4.3  | 8.3  | 3.3  | 8.7  | 59.5  | <1   | 205  | 0.6  | 8.1  | 3.2  | 140  | 1.1  | 136   | 25   | 49.5 | 6.02  | 22.3 | 4.32 | 0.96 | 4    | 0.65 | 3.88 | 21.6 | 0.81 |
|                 | 75-45       | 26.7     | 2.9   | 738  | 4    | 15.4 | 5.3  | 8.8  | 5.2  | 10.6 | 72.3  | <1   | 231  | 0.8  | 11.1 | 3.7  | 163  | 1.5  | 191   | 29.9 | 59.4 | 7.06  | 26.4 | 5.01 | 1.12 | 4.96 | 0.78 | 4.6  | 25.5 | 0.95 |
|                 | 45-25       | 17.8     | 1.71  | 844  | 4    | 17.9 | 5.8  | 10.1 | 6.7  | 11.9 | 75.6  | <1   | 261  | 0.8  | 10.8 | 4.4  | 176  | 1.1  | 241   | 32.5 | 63.2 | 7.7   | 29   | 5.53 | 1.21 | 5.34 | 0.85 | 5.15 | 29.4 | 1.11 |
|                 | <25         | 12.5     | 2.75  | 1131 | 5    | 23.2 | 7.1  | 18.7 | 7.2  | 14.4 | 93.5  | 2    | 371  | 1    | 13   | 5.8  | 227  | 1.6  | 258   | 37.4 | 74.9 | 9.17  | 35.2 | 6.82 | 1.56 | 6.75 | 1.06 | 6.62 | 38.3 | 1.41 |
| S4 ESP12        | >75         | 8.02     | 27.22 | 456  | <1   | 9.6  | 3.5  | 6.5  | 2.5  | 6.2  | 46.6  | <1   | 147  | 0.5  | 6.2  | 2.7  | 126  | 1.5  | 94.9  | 18.6 | 36.6 | 4.37  | 16.2 | 3.35 | 0.72 | 3.07 | 0.46 | 2.78 | 15.7 | 0.59 |
|                 | 75-45       | 14.4     | 10.14 | 743  | 5    | 14.4 | 5.1  | 10.7 | 4.4  | 9.7  | 71.3  | 1    | 223  | 0.7  | 9.3  | 4.1  | 176  | 1.6  | 170   | 29.4 | 57.6 | 6.99  | 27.6 | 4.97 | 1.12 | 4.57 | 0.7  | 4.14 | 24.5 | 0.89 |
|                 | 45-25       | 26.1     | 4.84  | 999  | 3    | 20   | 6.9  | 19.9 | 5.5  | 12.5 | 88.9  | 2    | 319  | 0.9  | 11.5 | 5.9  | 241  | 2.6  | 203   | 34.6 | 68.1 | 8.31  | 31.7 | 6.11 | 1.36 | 5.78 | 0.91 | 5.45 | 32   | 1.18 |
|                 | <25         | 49.6     | 1.62  | 1334 | 6    | 26.3 | 8.5  | 31.8 | 5.5  | 15.2 | 109   | 3    | 393  | 1.1  | 13.8 | 6.9  | 293  | 2.9  | 200   | 41.4 | 81.2 | 9.85  | 38.2 | 7.45 | 1.71 | 7.06 | 1.12 | 6.89 | 39.6 | 1.47 |
|                 | 45-25 ws    | 5.71     | 2.7   | 842  | 3    | 16.4 | 6.2  | 11.3 | 5.5  | 11.1 | 79.8  | 1    | 252  | 0.8  | 10.8 | 4.5  | 184  | 1.2  | 199   | 31.1 | 62.7 | 7.54  | 28.8 | 5.57 | 1.21 | 5.42 | 0.82 | 4.93 | 29.2 | 1.08 |
|                 | <25 ws      | 71.4     | 5.59  | 1369 | 5    | 27   | 8.7  | 32.5 | 5.6  | 15.7 | 111   | 3    | 391  | 1    | 14.3 | 7.3  | 275  | 2.4  | 205   | 42.7 | 82.9 | 10.2  | 38.2 | 7.5  | 1.68 | 7.21 | 1.14 | 6.76 | 40   | 1.46 |
| S4 ESP22        | >75         | 4.90     | 53.9  | 492  | 2    | 9.1  | 3    | 11.6 | 1.9  | 5.4  | 39.4  | 1    | 147  | 0.4  | 5.4  | 3.4  | 140  | 2.3  | 68.3  | 16.2 | 30.7 | 3.92  | 14.9 | 2.82 | 0.65 | 2.58 | 0.41 | 2.43 | 14.1 | 0.54 |
|                 | 75-45       | 10.0     | 20.78 | 970  | 5    | 18.7 | 5.7  | 23.2 | 3.6  | 10.6 | 75.3  | 3    | 270  | 0.7  | 10.2 | 5.7  | 252  | 2.8  | 139   | 32   | 61.6 | 7.45  | 28.5 | 5.62 | 1.19 | 5    | 0.8  | 4.74 | 27.1 | 1    |
|                 | 45-25       | 28.5     | 5.17  | 1265 | 7    | 25.2 | 7.4  | 32.5 | 4.9  | 14   | 95.2  | 4    | 356  | 0.9  | 13.8 | 7.2  | 316  | 3.4  | 178   | 39.5 | 76.6 | 9.42  | 36   | 7.21 | 1.62 | 6.83 | 1.06 | 6.7  | 37.5 | 1.27 |
|                 | <25         | 55.0     | 1.57  | 1490 | 8    | 29.6 | 9    | 39.9 | 5.1  | 15.4 | 109   | 5    | 413  | 1.1  | 14.9 | 8    | 340  | 4    | 187   | 45.3 | 86.9 | 10.9  | 41.8 | 7.89 | 1.84 | 7.76 | 1.18 | 7.39 | 43.8 | 1.44 |
| S4 ESP32        | >75         | 3.61     | 41.71 | 1020 | 5    | 18.4 | 4.4  | 27.9 | 2.9  | 8.6  | 56.5  | 4    | 276  | 0.6  | 8.6  | 5.5  | 241  | 4    | 103   | 26   | 49.6 | 6.16  | 23.8 | 4.59 | 1.03 | 4.38 | 0.67 | 3.99 | 23.4 | 0.88 |
|                 | 75-45       | 19.0     | 18.54 | 1342 | 2    | 25.2 | 6.6  | 38.6 | 4.2  | 12.5 | 84.9  | 5    | 361  | 0.8  | 12.5 | 8.1  | 346  | 4.7  | 151   | 38.3 | 72.2 | 8.93  | 34.3 | 6.51 | 1.44 | 6.27 | 0.96 | 5.78 | 32.7 | 1.19 |
|                 | 45-25       | 32.8     | 3.4   | 1611 | 5    | 30.4 | 8.4  | 44.2 | 4.9  | 15   | 101   | 6    | 430  | 1    | 15.1 | 9.3  | 378  | 6.1  | 183   | 45.5 | 86.1 | 10.7  | 41.3 | 7.97 | 1.83 | 7.69 | 1.18 | 7.24 | 42.6 | 1.48 |
|                 | <25         | 46.3     | 1.25  | 1663 | 6    | 32.4 | 8.7  | 46.8 | 4.9  | 15.6 | 107   | 6    | 440  | 1    | 15.6 | 9    | 388  | 4.7  | 182   | 46.7 | 90.2 | 11.2  | 41.4 | 8.19 | 1.95 | 7.87 | 1.24 | 7.51 | 44.3 | 1.57 |
| Minimum         |             |          |       | 410  | 1    | 8.8  | 3.0  | 6.5  | 1.9  | 5.4  | 39.4  | 1    | 147  | 0.4  | 5.4  | 2.3  | 111  | 0.8  | 68.3  | 16.2 | 30.7 | 3.92  | 14.9 | 2.82 | 0.65 | 2.58 | 0.41 | 2.43 | 14.1 | 0.54 |
| Average         |             |          |       | 875  | 4    | 17.9 | 6.3  | 18.3 | 5.0  | 11.7 | 84.2  | 2    | 260  | 0.8  | 11.2 | 4.9  | 216  | 2.0  | 184.1 | 33.2 | 64.3 | 7.83  | 29.8 | 5.84 | 1.29 | 5.48 | 0.86 | 5.16 | 30.1 | 1.07 |
| Maximum         |             |          |       | 1663 | 8    | 32.4 | 9.0  | 46.8 | 7.8  | 15.7 | 115.7 | 9    | 440  | 1.1  | 15.6 | 9.3  | 388  | 6.1  | 295.6 | 46.7 | 90.2 | 11.22 | 41.8 | 8.19 | 1.95 | 7.87 | 1.24 | 7.51 | 44.3 | 1.57 |
| CV (%)          |             |          |       | 27.7 | 39.3 | 26.7 | 22.9 | 48.4 | 22.6 | 20.7 | 20.1  | 62.2 | 25.1 | 21.2 | 20.1 | 27.7 | 25.6 | 53.2 | 22.6  | 19.3 | 19.5 | 19.8  | 19.9 | 19.8 | 20.6 | 20.7 | 20.3 | 21.1 | 21.3 | 20.5 |

Table S6 – Continuation.

| Sample         | Fraction    | Er   | Tm   | Yb   | Lu   | ΣREE   | REO    | L/H  | Critical | Uncritical | Excessive | EF   | Recovery | La <sub>N</sub> /<br>Lu <sub>N</sub> | La <sub>N</sub> /<br>Sm <sub>N</sub> | Gd <sub>N</sub> /<br>Lu <sub>N</sub> | Y <sub>N</sub> /<br>Ho <sub>N</sub> | Eu <sub>N</sub> /<br>Eu* | Ce <sub>N</sub> /<br>Ce <sub>N</sub> * | Gd <sub>N</sub> /<br>Gd <sub>N</sub> * | REYdef,<br>rel% | C <sub>outl</sub> |
|----------------|-------------|------|------|------|------|--------|--------|------|----------|------------|-----------|------|----------|--------------------------------------|--------------------------------------|--------------------------------------|-------------------------------------|--------------------------|----------------------------------------|----------------------------------------|-----------------|-------------------|
| S1 ESP         | >75         | 2.62 | 0.37 | 2.27 | 0.36 | 155.5  | 186.84 | 7.66 | 54.98    | 43.52      | 56.97     | 0.75 | 8.05     | 0.79                                 | 0.91                                 | 0.91                                 | 1.03                                | 1.07                     | 0.94                                   | 1.08                                   | 35.36           | 0.97              |
| 35/45          | 75-45       | 2.86 | 0.42 | 2.76 | 0.41 | 175.5  | 210.96 | 7.32 | 64.85    | 48.40      | 62.26     | 0.85 | 11.55    | 0.76                                 | 0.91                                 | 0.92                                 | 1.12                                | 1.07                     | 0.91                                   | 1.10                                   | 36.95           | 1.04              |
|                | 45-25       | 3.31 | 0.48 | 3.04 | 0.46 | 196.7  | 236.53 | 7.16 | 72.10    | 53.41      | 71.18     | 0.95 | 22.35    | 0.73                                 | 0.84                                 | 0.96                                 | 1.12                                | 1.00                     | 0.95                                   | 1.12                                   | 36.66           | 1.01              |
|                | <25         | 3.9  | 0.55 | 3.54 | 0.57 | 235.4  | 282.95 | 7.30 | 86.23    | 64.94      | 84.26     | 1.14 | 58.05    | 0.72                                 | 0.85                                 | 0.93                                 | 1.09                                | 1.05                     | 0.92                                   | 1.14                                   | 36.63           | 1.02              |
| S4 BA<br>(mm)  | >4          | 3.52 | 0.49 | 3.31 | 0.52 | 211.2  | 254.08 | 7.33 | 75.94    | 57.49      | 77.75     | 1.01 | 39.36    | 0.71                                 | 0.90                                 | 0.86                                 | 1.18                                | 1.03                     | 0.97                                   | 1.08                                   | 35.96           | 0.98              |
|                | 4-2         | 3.67 | 0.55 | 3.54 | 0.57 | 218.9  | 263.28 | 7.08 | 79.98    | 59.37      | 79.59     | 1.05 | 20.32    | 0.66                                 | 0.86                                 | 0.87                                 | 1.11                                | 1.01                     | 0.96                                   | 1.12                                   | 36.53           | 1.00              |
|                | 2-1         | 3.84 | 0.55 | 3.58 | 0.57 | 218.3  | 262.67 | 6.85 | 82.14    | 58.33      | 77.86     | 1.05 | 11.22    | 0.65                                 | 0.86                                 | 0.85                                 | 1.15                                | 1.05                     | 0.95                                   | 1.08                                   | 37.62           | 1.05              |
|                | 1-0.5       | 3.56 | 0.5  | 3.26 | 0.52 | 206.3  | 248.05 | 7.10 | 75.89    | 56.48      | 73.94     | 0.99 | 5.03     | 0.69                                 | 0.87                                 | 0.89                                 | 1.11                                | 1.02                     | 0.93                                   | 1.12                                   | 36.78           | 1.03              |
|                | 0.5-0.25    | 3.42 | 0.51 | 3.27 | 0.49 | 200.1  | 240.68 | 7.00 | 73.52    | 54.16      | 72.41     | 0.96 | 4.38     | 0.70                                 | 0.88                                 | 0.93                                 | 1.12                                | 1.06                     | 0.94                                   | 1.14                                   | 36.74           | 1.02              |
|                | 0.25-0.125  | 3.28 | 0.48 | 3.11 | 0.47 | 191.4  | 230.09 | 7.00 | 69.49    | 52.23      | 69.68     | 0.92 | 5.77     | 0.70                                 | 0.85                                 | 0.92                                 | 1.04                                | 1.02                     | 0.94                                   | 1.10                                   | 36.31           | 1.00              |
|                | 0.125-0.090 | 3.14 | 0.45 | 2.98 | 0.46 | 184    | 221.23 | 6.98 | 67.78    | 49.86      | 66.37     | 0.88 | 2.98     | 0.69                                 | 0.89                                 | 0.90                                 | 1.06                                | 1.06                     | 0.94                                   | 1.12                                   | 36.83           | 1.02              |
|                | 0.090-0.063 | 3.34 | 0.51 | 3.2  | 0.47 | 198.2  | 238.41 | 7.02 | 73.67    | 52.60      | 71.97     | 0.95 | 3.74     | 0.70                                 | 0.85                                 | 0.93                                 | 1.05                                | 1.03                     | 0.96                                   | 1.10                                   | 37.16           | 1.02              |
|                | <0.063      | 3.46 | 0.48 | 3.26 | 0.5  | 197.9  | 237.96 | 6.93 | 72.79    | 53.48      | 71.66     | 0.95 | 7.20     | 0.67                                 | 0.84                                 | 0.90                                 | 1.09                                | 1.05                     | 0.95                                   | 1.14                                   | 36.78           | 1.02              |
| S4 ECO<br>(μm) | >150        | 3.1  | 0.47 | 3.08 | 0.46 | 186.9  | 224.66 | 6.93 | 69.02    | 50.74      | 67.09     | 1.08 | 14.61    | 0.70                                 | 0.90                                 | 0.91                                 | 1.09                                | 1.09                     | 0.93                                   | 1.12                                   | 36.94           | 1.03              |
|                | 150-75      | 2.29 | 0.33 | 2.28 | 0.34 | 144.3  | 173.45 | 7.41 | 51.68    | 39.34      | 53.26     | 0.84 | 22.81    | 0.74                                 | 0.88                                 | 0.91                                 | 1.05                                | 1.04                     | 0.95                                   | 1.08                                   | 35.82           | 0.97              |
|                | 75-45       | 2.83 | 0.41 | 2.65 | 0.42 | 172    | 206.76 | 7.32 | 61.23    | 46.93      | 63.83     | 1.00 | 26.61    | 0.71                                 | 0.90                                 | 0.92                                 | 1.06                                | 1.04                     | 0.96                                   | 1.13                                   | 35.60           | 0.96              |
|                | 45-25       | 3.17 | 0.47 | 3.19 | 0.48 | 188.3  | 226.39 | 7.04 | 68.78    | 51.07      | 68.45     | 1.09 | 19.41    | 0.68                                 | 0.89                                 | 0.86                                 | 1.05                                | 1.02                     | 0.94                                   | 1.11                                   | 36.53           | 1.00              |
|                | <25         | 4.07 | 0.6  | 3.97 | 0.6  | 228.4  | 274.77 | 6.58 | 86.81    | 60.14      | 81.48     | 1.32 | 16.56    | 0.62                                 | 0.83                                 | 0.87                                 | 1.07                                | 1.06                     | 0.95                                   | 1.13                                   | 38.00           | 1.07              |
| S4 ESP12       | >75         | 1.69 | 0.25 | 1.6  | 0.25 | 106.2  | 127.70 | 7.47 | 37.55    | 29.39      | 39.29     | 0.51 | 4.11     | 0.74                                 | 0.84                                 | 0.95                                 | 1.05                                | 1.04                     | 0.96                                   | 1.14                                   | 35.35           | 0.96              |
|                | 75-45       | 2.56 | 0.38 | 2.38 | 0.39 | 168.2  | 202.14 | 7.98 | 60.62    | 45.93      | 61.64     | 0.81 | 11.66    | 0.75                                 | 0.90                                 | 0.91                                 | 1.09                                | 1.08                     | 0.95                                   | 1.12                                   | 36.04           | 0.98              |
|                | 45-25       | 3.5  | 0.52 | 3.24 | 0.51 | 203.3  | 244.41 | 7.12 | 74.92    | 54.80      | 73.55     | 0.98 | 25.56    | 0.68                                 | 0.86                                 | 0.88                                 | 1.07                                | 1.05                     | 0.95                                   | 1.11                                   | 36.86           | 1.02              |
|                | <25         | 4.27 | 0.61 | 3.91 | 0.62 | 245.4  | 295.05 | 6.93 | 91.79    | 65.76      | 87.81     | 1.18 | 58.67    | 0.67                                 | 0.84                                 | 0.88                                 | 1.06                                | 1.08                     | 0.95                                   | 1.11                                   | 37.41           | 1.05              |
|                | 45-25 ws    | 3.08 | 0.46 | 2.9  | 0.44 | 185.3  | 222.79 | 7.16 | 68.04    | 49.63      | 67.58     | 0.84 | 4.78     | 0.71                                 | 0.85                                 | 0.95                                 | 1.07                                | 1.02                     | 0.96                                   | 1.15                                   | 36.73           | 1.01              |
|                | <25 ws      | 4.19 | 0.62 | 3.87 | 0.59 | 249    | 299.46 | 7.09 | 91.97    | 67.60      | 89.44     | 1.13 | 80.44    | 0.72                                 | 0.86                                 | 0.95                                 | 1.08                                | 1.05                     | 0.94                                   | 1.11                                   | 36.93           | 1.03              |
| S4 ESP22       | >75         | 1.51 | 0.22 | 1.46 | 0.22 | 92.66  | 111.35 | 7.38 | 34.00    | 25.52      | 33.14     | 0.39 | 1.93     | 0.74                                 | 0.87                                 | 0.91                                 | 1.03                                | 1.09                     | 0.91                                   | 1.09                                   | 36.69           | 1.03              |
|                | 75-45       | 2.89 | 0.42 | 2.83 | 0.41 | 181.6  | 218.21 | 7.54 | 65.22    | 50.07      | 66.26     | 0.77 | 7.76     | 0.78                                 | 0.86                                 | 0.95                                 | 1.07                                | 1.01                     | 0.94                                   | 1.08                                   | 35.92           | 0.98              |
|                | 45-25       | 3.9  | 0.56 | 3.6  | 0.56 | 232.3  | 279.37 | 6.96 | 86.78    | 62.96      | 82.59     | 0.99 | 28.14    | 0.71                                 | 0.83                                 | 0.95                                 | 1.17                                | 1.06                     | 0.93                                   | 1.12                                   | 37.35           | 1.05              |
|                | <25         | 4.41 | 0.64 | 3.96 | 0.62 | 265.8  | 319.71 | 7.10 | 100.42   | 71.85      | 93.56     | 1.13 | 62.17    | 0.73                                 | 0.87                                 | 0.97                                 | 1.20                                | 1.09                     | 0.92                                   | 1.15                                   | 37.78           | 1.07              |
| S4 ESP32       | >75         | 2.44 | 0.35 | 2.26 | 0.34 | 149.9  | 180.18 | 7.26 | 55.33    | 41.13      | 53.43     | 0.58 | 2.09     | 0.76                                 | 0.86                                 | 1.00                                 | 1.05                                | 1.06                     | 0.92                                   | 1.14                                   | 36.91           | 1.04              |
|                | 75-45       | 3.45 | 0.51 | 3.2  | 0.5  | 216.2  | 259.88 | 7.40 | 78.63    | 60.01      | 77.60     | 0.83 | 15.87    | 0.77                                 | 0.89                                 | 0.97                                 | 1.09                                | 1.04                     | 0.92                                   | 1.14                                   | 36.36           | 1.01              |
|                | 45-25       | 4.35 | 0.62 | 3.99 | 0.61 | 263.2  | 316.45 | 7.12 | 98.50    | 71.88      | 92.80     | 1.02 | 33.34    | 0.75                                 | 0.87                                 | 0.98                                 | 1.14                                | 1.08                     | 0.92                                   | 1.14                                   | 37.43           | 1.06              |
|                | <25         | 4.69 | 0.64 | 4.16 | 0.65 | 272.3  | 327.49 | 7.05 | 101.09   | 73.98      | 97.22     | 1.05 | 48.70    | 0.72                                 | 0.86                                 | 0.94                                 | 1.12                                | 1.11                     | 0.93                                   | 1.12                                   | 37.13           | 1.04              |
| Minimum        |             | 1.51 | 0.22 | 1.46 | 0.22 | 92.66  | 111.35 | 6.58 | 34.00    | 25.52      | 33.14     | 0.39 | 1.93     | 0.62                                 | 0.81                                 | 0.85                                 | 1.03                                | 0.98                     | 0.91                                   | 1.06                                   | 34.79           | 0.93              |
| Average        |             | 3.17 | 0.46 | 2.97 | 0.46 | 192.01 | 230.87 | 7.27 | 70.40    | 52.33      | 69.28     | 0.95 | 22.16    | 0.73                                 | 0.86                                 | 0.92                                 | 1.11                                | 1.04                     | 0.94                                   | 1.11                                   | 36.61           | 1.01              |
| Maximum        |             | 4.69 | 0.64 | 4.16 | 0.65 | 272.29 | 327.49 | 7.98 | 101.09   | 73.98      | 97.22     | 1.34 | 80.44    | 0.81                                 | 0.91                                 | 1.00                                 | 1.20                                | 1.11                     | 0.97                                   | 1.16                                   | 38.17           | 1.09              |
| CV (%)         |             | 21.0 | 21.2 | 20.4 | 20.6 | 19.9   | 19.9   | 3.5  | 20.5     | 19.5       | 19.5      | 19.6 | 87.3     | 5.1                                  | 2.8                                  | 3.5                                  | 4.1                                 | 2.6                      | 1.6                                    | 2.0                                    | 1.7             | 2.9               |

BA, bottom ash; ECO, economizer; ESP, Electrostatic precipitator; CV, coefficient of variation; REO, rare earth elements as oxides; L/H, ratio between light REE and heavy REE; REYdef, rel%,  
 $(Y+Nd+Eu+Tb+Dy+Er)/\Sigma REE$ ; C<sub>outl</sub>,  $((Nd+Eu+Tb+Dy+Er+Y)/\Sigma REE)/((Ce+Ho+Tm+Yb+Lu)/\Sigma REE)$

Table S7 - Trace elements (ppm), enrichment patterns, anomalies for individual REE for coal combustion ashes magnetic and non-magnetic fractions.

|                                     | S1 BA |         | S1 ECO |         | S1 ESP |         | S4 BA |         | S4 ECO |         | S4 ESP12 |         | Min   | Avg   | Max   | CV (%) |
|-------------------------------------|-------|---------|--------|---------|--------|---------|-------|---------|--------|---------|----------|---------|-------|-------|-------|--------|
|                                     | Mag   | Non-mag | Mag    | Non-mag | Mag    | Non-mag | Mag   | Non-mag | Mag    | Non-mag | Mag      | Non-mag |       |       |       |        |
| wt. %                               | 5.44  | 94.24   | 11.58  | 87.73   | 4.49   | 94.09   | 5.54  | 94.13   | 13.06  | 85.74   | 5.94     | 93.24   |       |       |       |        |
| Ba                                  | 821   | 858     | 686    | 756     | 641    | 958     | 859   | 928     | 704    | 823     | 679      | 1112    | 641   | 819   | 1112  | 16.0   |
| Be                                  | 4     | 3       | 4      | 6       | 5      | 3       | 2     | 5       | 3      | 3       | 5        | 4       | 2     | 4     | 6     | 28.5   |
| Co                                  | 19.8  | 17.1    | 21.7   | 13.1    | 43.7   | 18.1    | 23.4  | 18.5    | 34.1   | 14      | 44.1     | 19.7    | 13.1  | 23.9  | 44.1  | 42.9   |
| Cs                                  | 6.3   | 6.9     | 3.8    | 5.2     | 3.6    | 8.1     | 5.3   | 6.6     | 3.8    | 5.7     | 3.2      | 7.80    | 3.2   | 5.5   | 8.1   | 29.0   |
| Ga                                  | 15.6  | 13.7    | 13.8   | 12      | 27.8   | 23.2    | 12.7  | 12.8    | 13.5   | 11.1    | 24.1     | 22.4    | 11.1  | 16.9  | 27.8  | 32.7   |
| Hf                                  | 5.4   | 5.9     | 3.4    | 6.2     | 3      | 5.4     | 5.1   | 5.8     | 3.6    | 5       | 3        | 5.4     | 3.0   | 4.8   | 6.2   | 23.6   |
| Nb                                  | 12.1  | 12.5    | 8.4    | 10.5    | 8.7    | 13.5    | 11.7  | 12.9    | 9.4    | 11.3    | 8.7      | 13.2    | 8.4   | 11.1  | 13.5  | 16.2   |
| Rb                                  | 86.7  | 93.3    | 51.6   | 76.3    | 48.1   | 104.5   | 73.4  | 84      | 54.5   | 76.7    | 45.8     | 98.1    | 45.8  | 74.4  | 104.5 | 26.0   |
| Sn                                  | 1     | <1      | 1      | 1       | 4      | 4       | 1     | <1      | 1      | <1      | 3        | 2       | <1    | 2     | 4     | 77.6   |
| Sr                                  | 248.6 | 242.1   | 214.1  | 211.5   | 216.3  | 257.6   | 269.9 | 282.5   | 245.3  | 250.6   | 229.8    | 320.0   | 211.5 | 249.0 | 320.0 | 12.0   |
| Ta                                  | 0.8   | 0.8     | 0.7    | 0.8     | 0.6    | 1       | 0.8   | 0.9     | 0.7    | 0.7     | 0.6      | 0.90    | 0.6   | 0.8   | 1.0   | 15.0   |
| Th                                  | 12.5  | 11.7    | 8.8    | 10      | 9.4    | 12.7    | 11.5  | 11.9    | 9.3    | 10.4    | 8.6      | 12.60   | 8.6   | 10.8  | 12.7  | 13.7   |
| U                                   | 4.8   | 4.7     | 4.9    | 3.9     | 8.5    | 5.6     | 4.7   | 4.8     | 5      | 3.9     | 7.6      | 6.1     | 3.9   | 5.4   | 8.5   | 25.0   |
| V                                   | 228   | 204     | 236    | 159     | 420    | 229     | 205   | 192     | 229    | 166     | 372      | 239     | 159   | 240   | 420   | 31.2   |
| W                                   | 2.9   | 1.2     | 1.8    | 1.5     | 5.1    | 1.7     | 1.7   | 1.1     | 1.9    | 1       | 2.7      | 1.6     | 1     | 2.0   | 5.1   | 53.6   |
| Zr                                  | 195.5 | 215.4   | 128.3  | 227     | 111.3  | 190.7   | 183.8 | 208.6   | 135.9  | 184.5   | 113.5    | 192.2   | 111.3 | 173.9 | 227   | 22.4   |
| La                                  | 34.7  | 34.7    | 27.9   | 29.4    | 27.9   | 37      | 32.5  | 35.6    | 28.3   | 30.5    | 26.9     | 37.6    | 26.9  | 31.9  | 37.6  | 11.7   |
| Ce                                  | 68.2  | 69.5    | 54.8   | 57.3    | 54.8   | 72.9    | 64.2  | 68.5    | 55.4   | 60.7    | 51.7     | 72.7    | 51.7  | 62.6  | 72.9  | 11.8   |
| Pr                                  | 8.24  | 8.25    | 6.76   | 7       | 6.68   | 8.79    | 7.83  | 8.38    | 6.7    | 7.32    | 6.37     | 8.83    | 6.37  | 7.60  | 8.83  | 11.2   |
| Nd                                  | 31.1  | 32      | 26     | 26.1    | 26.1   | 33.5    | 31    | 31.4    | 26     | 27.9    | 25.3     | 34      | 25.3  | 29.2  | 34    | 10.7   |
| Sm                                  | 6.2   | 6.09    | 5.28   | 5.16    | 5.24   | 6.67    | 5.8   | 6.15    | 5.37   | 5.37    | 5.12     | 6.65    | 5.12  | 5.76  | 6.67  | 9.6    |
| Eu                                  | 1.4   | 1.33    | 1.23   | 1.14    | 1.28   | 1.4     | 1.32  | 1.38    | 1.2    | 1.16    | 1.23     | 1.43    | 1.14  | 1.29  | 1.43  | 7.4    |
| Gd                                  | 5.78  | 5.86    | 5.39   | 4.86    | 5.35   | 6.07    | 5.65  | 5.83    | 5.37   | 5.03    | 5.15     | 6.2     | 4.86  | 5.55  | 6.20  | 7.2    |
| Tb                                  | 0.94  | 0.89    | 0.87   | 0.78    | 0.83   | 0.94    | 0.91  | 0.94    | 0.83   | 0.79    | 0.82     | 0.98    | 0.78  | 0.88  | 0.98  | 7.2    |
| Dy                                  | 5.55  | 5.38    | 5.15   | 4.76    | 4.92   | 5.52    | 5.45  | 5.63    | 5.13   | 4.8     | 4.97     | 5.8     | 4.76  | 5.26  | 5.8   | 6.3    |
| Y                                   | 31.7  | 29.9    | 28.6   | 25.8    | 27.2   | 30.6    | 30.9  | 33.1    | 29.5   | 28      | 28.3     | 34      | 25.8  | 29.8  | 34    | 7.7    |
| Ho                                  | 1.14  | 1.14    | 1.05   | 0.94    | 1.02   | 1.12    | 1.13  | 1.18    | 1.03   | 1.05    | 1.04     | 1.19    | 0.94  | 1.09  | 1.19  | 6.6    |
| Er                                  | 3.44  | 3.36    | 3.05   | 2.81    | 2.84   | 3.32    | 3.3   | 3.44    | 2.96   | 2.98    | 3.09     | 3.7     | 2.81  | 3.19  | 3.70  | 8.3    |
| Tm                                  | 0.51  | 0.48    | 0.43   | 0.43    | 0.42   | 0.5     | 0.5   | 0.51    | 0.45   | 0.44    | 0.44     | 0.53    | 0.42  | 0.47  | 0.53  | 7.9    |
| Yb                                  | 3.26  | 3.09    | 2.81   | 2.7     | 2.68   | 3.28    | 3.16  | 3.38    | 2.82   | 2.81    | 2.67     | 3.33    | 2.67  | 3.00  | 3.38  | 8.8    |
| Lu                                  | 0.52  | 0.48    | 0.42   | 0.43    | 0.42   | 0.5     | 0.48  | 0.51    | 0.44   | 0.45    | 0.41     | 0.53    | 0.41  | 0.47  | 0.53  | 8.8    |
| $\Sigma$ REE                        | 202.7 | 202.5   | 169.7  | 169.6   | 167.7  | 212.1   | 194.1 | 205.9   | 171.5  | 179.3   | 163.5    | 217.5   | 163.5 | 188.0 | 217.5 | 10.0   |
| REO                                 | 243.7 | 243.3   | 204.1  | 203.9   | 201.6  | 254.9   | 233.4 | 247.7   | 206.3  | 215.6   | 196.6    | 261.5   | 196.6 | 226.0 | 261.5 | 10.0   |
| L/H                                 | 7.09  | 7.34    | 6.36   | 7.12    | 6.60   | 7.54    | 6.93  | 7.07    | 6.46   | 7.25    | 6.27     | 7.24    | 6.27  | 6.94  | 7.54  | 5.7    |
| EF                                  | 1.00  | 1.00    | 1.01   | 1.01    | 0.81   | 1.02    | 0.95  | 1.01    | 0.97   | 1.02    | 0.77     | 1.02    | 0.77  | 0.97  | 1.02  | 8.5    |
| Recovery                            | 5.47  | 94.53   | 11.67  | 88.33   | 3.63   | 96.37   | 5.26  | 94.74   | 12.72  | 87.28   | 4.57     | 95.43   | 3.63  | 50.00 | 96.37 | 85.9   |
| Critical                            | 74.13 | 72.86   | 64.9   | 61.39   | 63.17  | 75.28   | 72.88 | 75.89   | 65.62  | 65.63   | 63.71    | 79.91   | 61.39 | 69.61 | 79.91 | 8.5    |
| Uncritical                          | 54.92 | 54.9    | 45.33  | 46.42   | 45.17  | 58.53   | 51.78 | 55.96   | 45.74  | 48.22   | 43.54    | 59.28   | 43.54 | 50.82 | 59.28 | 10.8   |
| Excessive                           | 73.63 | 74.69   | 59.51  | 61.8    | 59.34  | 78.3    | 69.47 | 74.08   | 60.14  | 65.45   | 56.26    | 78.28   | 56.26 | 67.58 | 78.30 | 11.4   |
| La <sub>N</sub> / Lu <sub>N</sub>   | 0.67  | 0.72    | 0.66   | 0.68    | 0.66   | 0.74    | 0.68  | 0.70    | 0.64   | 0.68    | 0.66     | 0.71    | 0.64  | 0.68  | 0.74  | 4.0    |
| La <sub>N</sub> / Sm <sub>N</sub>   | 0.85  | 0.86    | 0.80   | 0.86    | 0.81   | 0.84    | 0.85  | 0.88    | 0.80   | 0.86    | 0.80     | 0.86    | 0.80  | 0.84  | 0.88  | 3.4    |
| Gd <sub>N</sub> / Lu <sub>N</sub>   | 0.86  | 0.95    | 0.99   | 0.88    | 0.99   | 0.94    | 0.91  | 0.89    | 0.95   | 0.87    | 0.97     | 0.91    | 0.86  | 0.92  | 0.99  | 4.8    |
| Y <sub>N</sub> / Ho <sub>N</sub>    | 1.10  | 1.04    | 1.08   | 1.08    | 1.05   | 1.08    | 1.08  | 1.11    | 1.13   | 1.05    | 1.08     | 1.13    | 1.04  | 1.08  | 1.13  | 2.6    |
| Eu <sub>N</sub> / Eu*               | 1.06  | 1.03    | 1.06   | 1.03    | 1.12   | 1.00    | 1.05  | 1.05    | 1.04   | 1.02    | 1.10     | 1.01    | 1.00  | 1.05  | 1.12  | 3.2    |
| Ce <sub>N</sub> / Ce <sub>N</sub> * | 0.95  | 0.97    | 0.94   | 0.94    | 0.95   | 0.95    | 0.95  | 0.93    | 0.95   | 0.96    | 0.93     | 0.94    | 0.93  | 0.95  | 0.97  | 1.0    |
| Gd <sub>N</sub> / Gd <sub>N</sub> * | 1.08  | 1.15    | 1.12   | 1.10    | 1.15   | 1.11    | 1.11  | 1.09    | 1.15   | 1.11    | 1.13     | 1.10    | 1.08  | 1.12  | 1.15  | 1.9    |
| REYdef, rel%                        | 36.57 | 35.99   | 38.23  | 36.19   | 37.67  | 35.49   | 37.54 | 36.85   | 38.26  | 36.60   | 38.96    | 36.75   | 35.49 | 37.09 | 38.96 | 2.7    |
| C <sub>outl</sub>                   | 1.01  | 0.98    | 1.09   | 0.99    | 1.06   | 0.96    | 1.05  | 1.02    | 1.09   | 1.00    | 1.13     | 1.02    | 0.96  | 1.03  | 1.13  | 4.8    |

BA, bottom ash; ECO, economizer; ESP, Electrostatic precipitator; Mag, magnetic fraction; non-mag, non-magnetic fraction; CV, coefficient of variation; REO, rare earth elements as oxides; L/H, ratio between light REE and heavy REE; REYdef, rel%,  $(Y+Nd+Eu+Tb+Dy+Er)/\Sigma REE$ ; C<sub>outl</sub>,  $((Nd+Eu+Tb+Dy+Er+Y)/\Sigma REE)/((Ce+Ho+Tm+Yb+Lu)/\Sigma REE)$
